# Supplementary material for: Metabolome Mining of Curcuma longa L. Using HPLC-MS/MS and Molecular Networking
Source: MDPI journal article supplement (doi:10.3390/metabo13080898), 2023-07-29
Supplement: s1 [file s1]

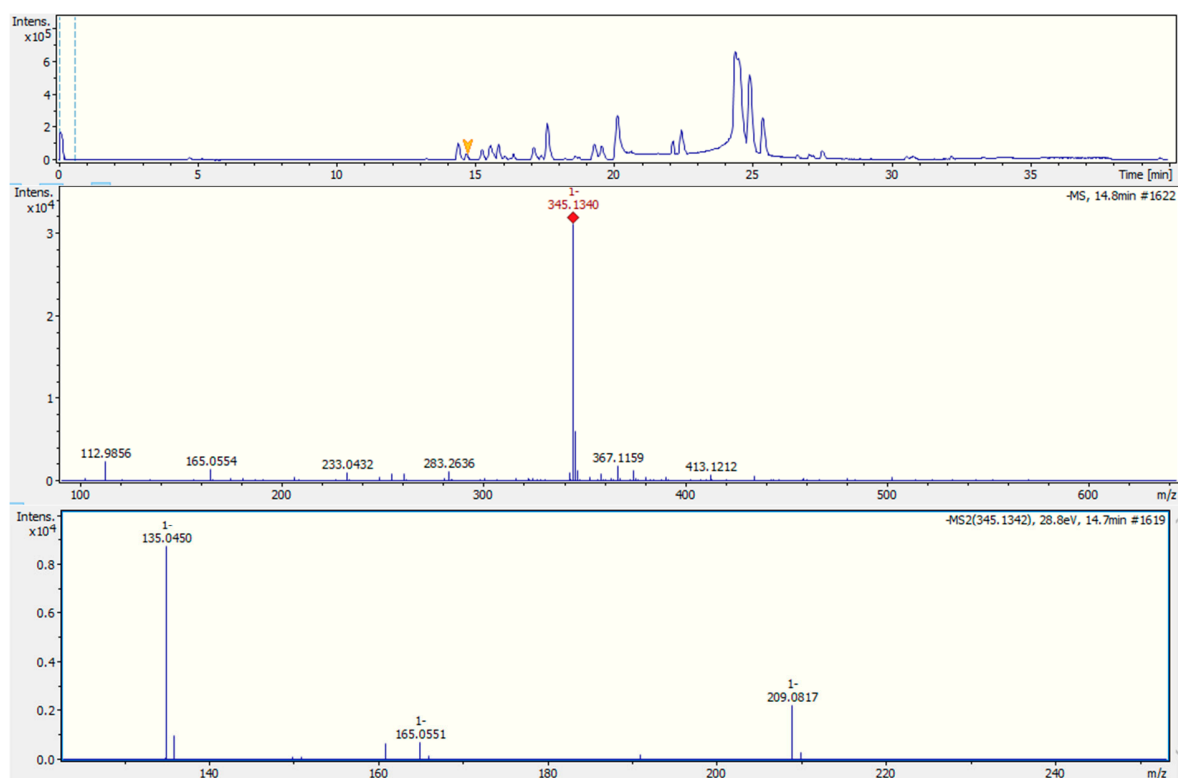

Figure S1. MS<sup>1</sup> and MS<sup>2</sup> spectra of compound 1

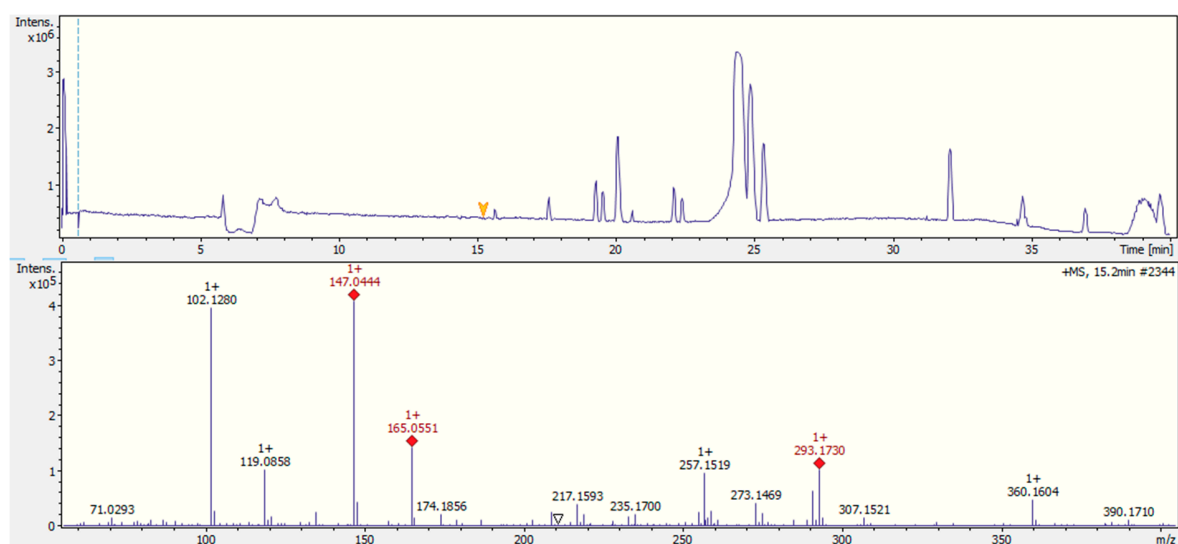

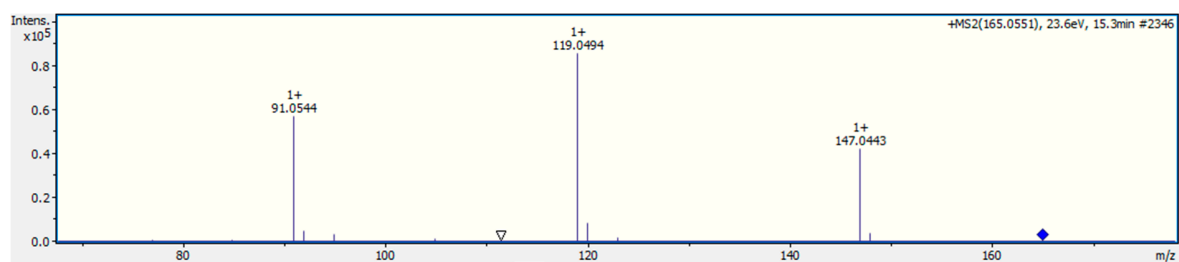

**Figure S2.** MS<sup>1</sup> and MS<sup>2</sup> spectra of compound 2

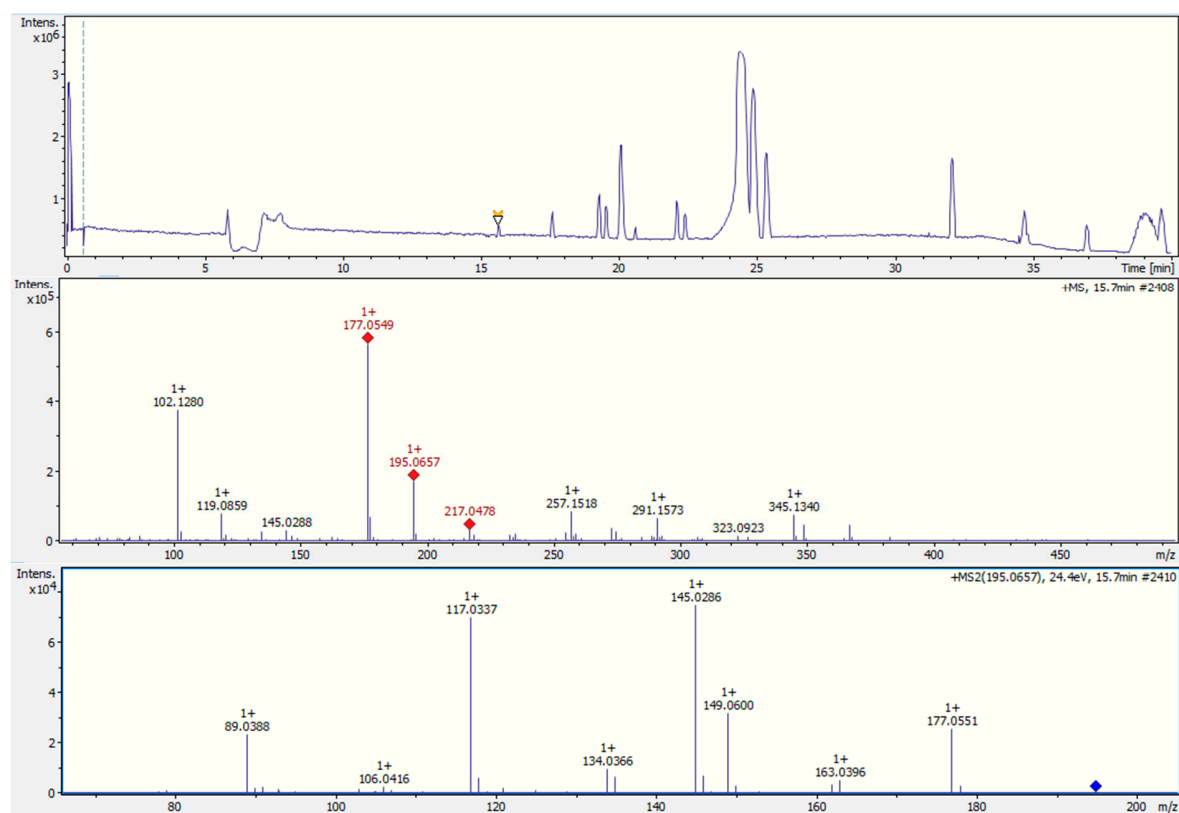

**Figure S3.** MS<sup>1</sup> and MS<sup>2</sup> spectra of compound 3

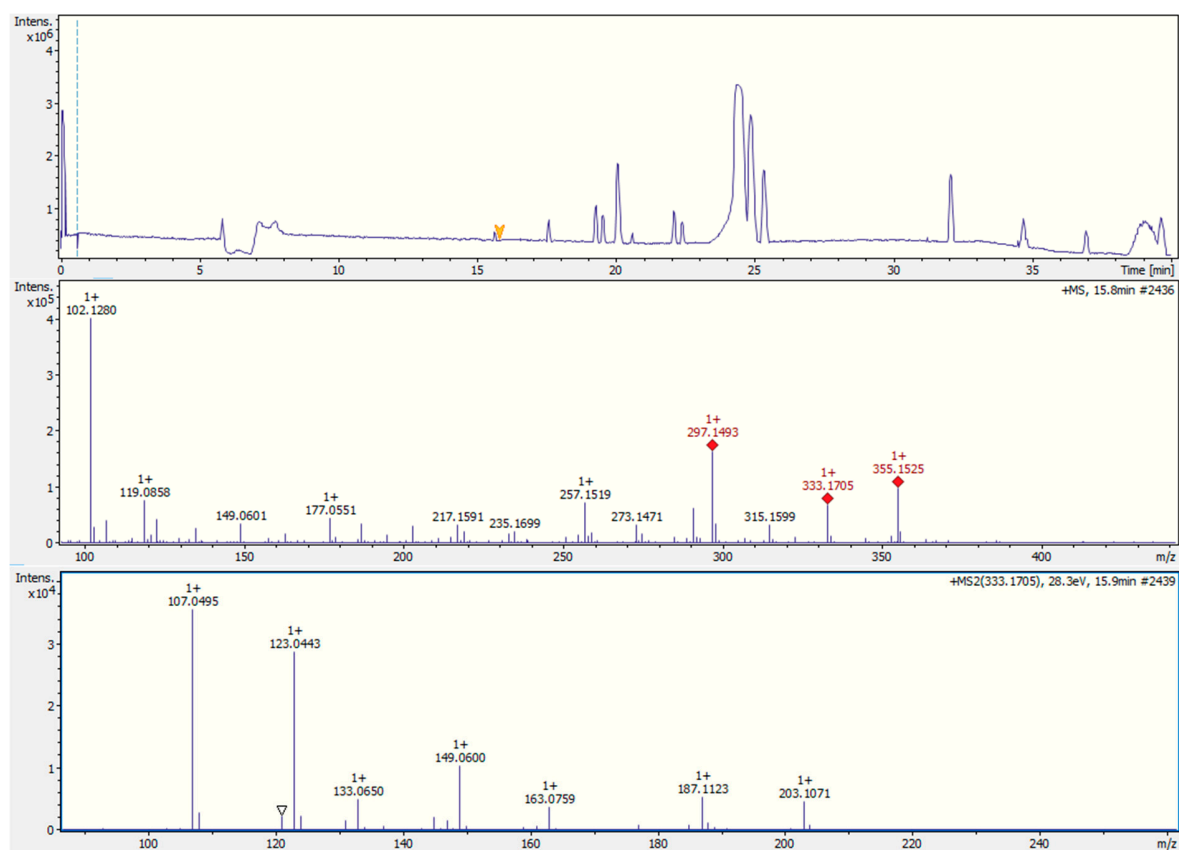

**Figure S4.**  $MS^1$  and  $MS^2$  spectra of compound 4

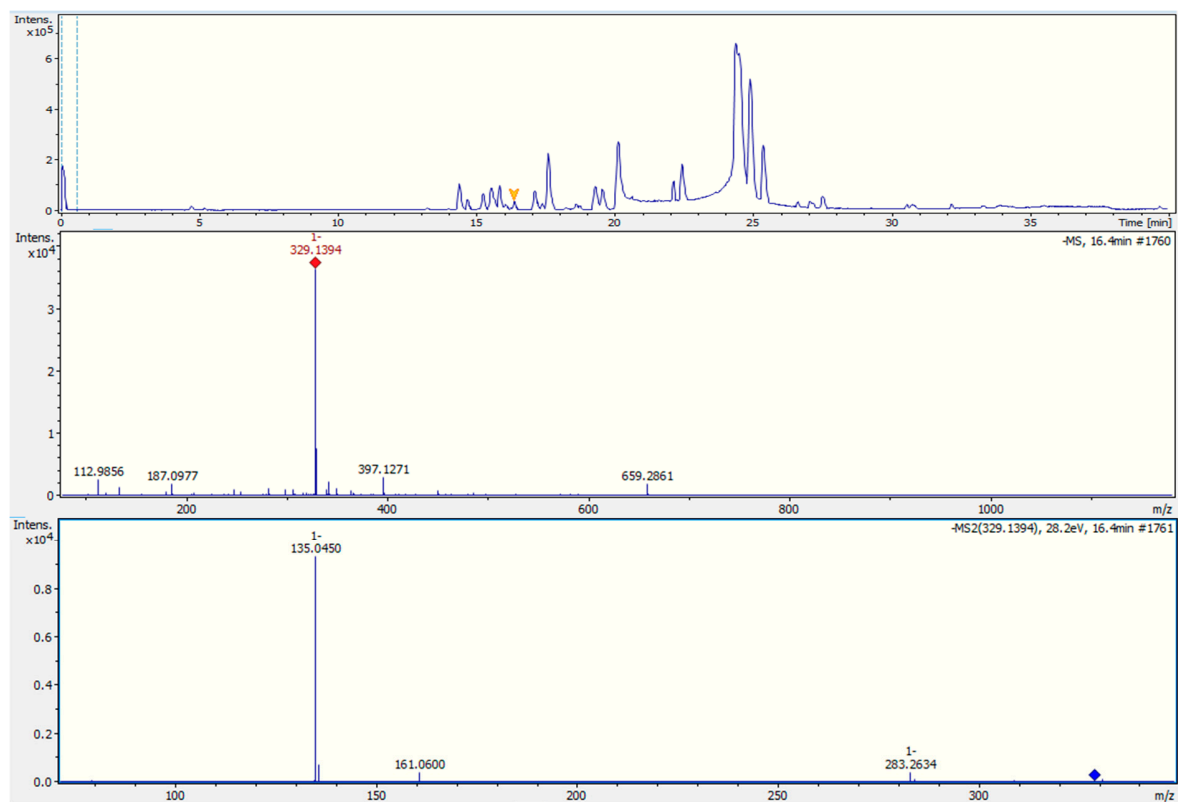

**Figure S5.** MS<sup>1</sup> and MS<sup>2</sup> spectra of compound **5**



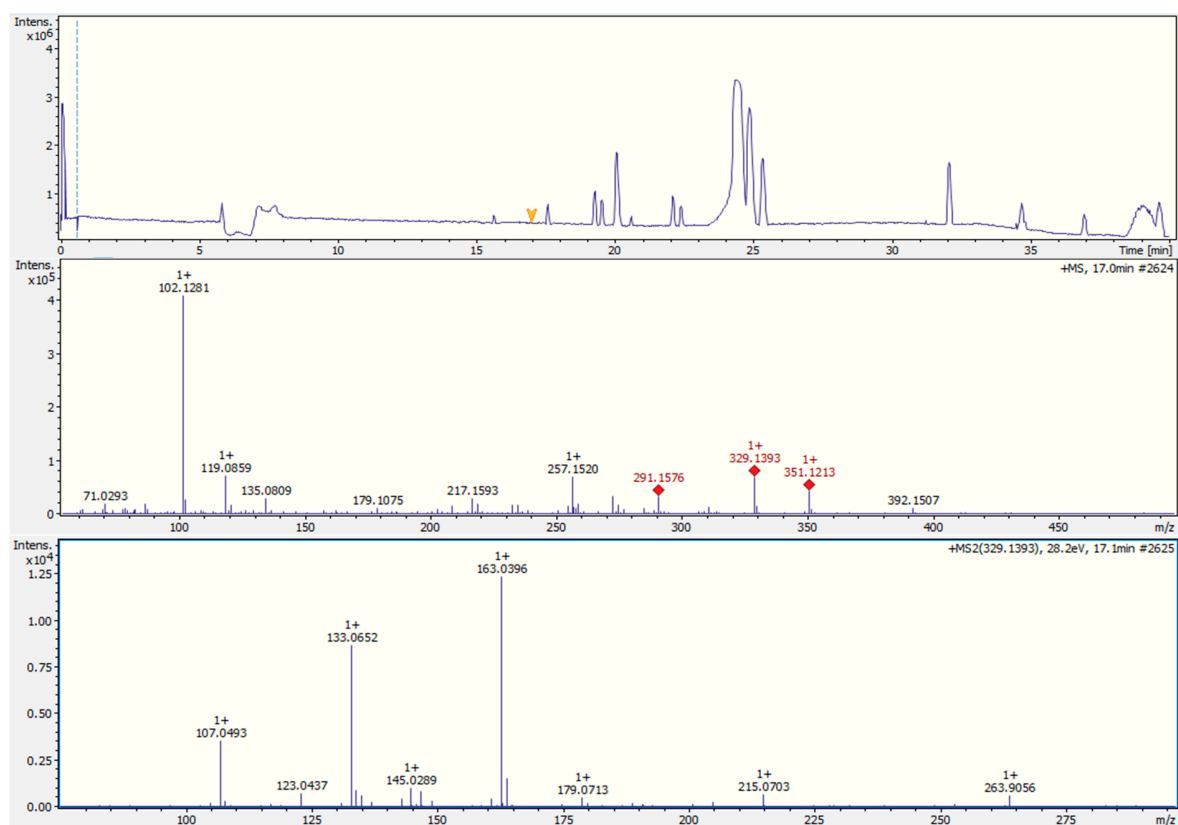

**Figure S6.** MS<sup>1</sup> and MS<sup>2</sup> spectra of compound 6

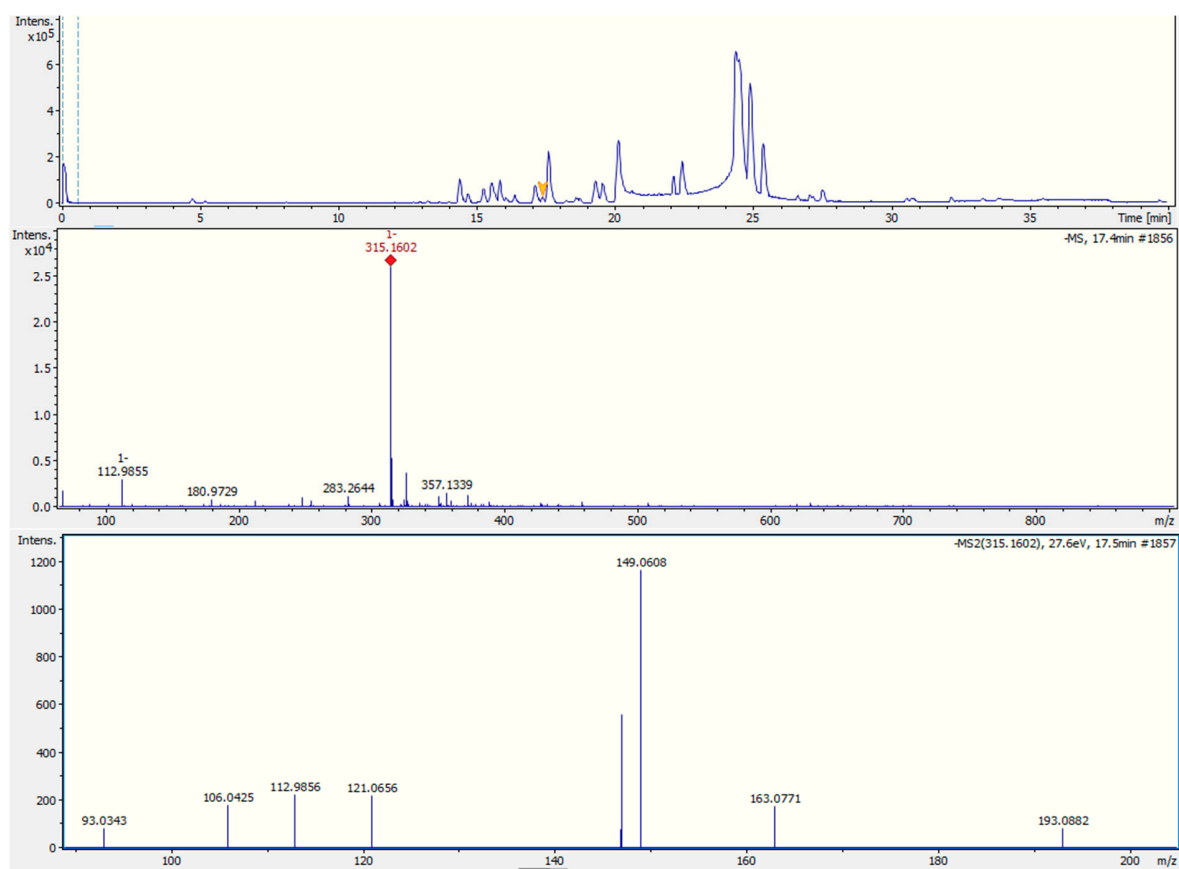

**Figure S7.** MS<sup>1</sup> and MS<sup>2</sup> spectra of compound 7

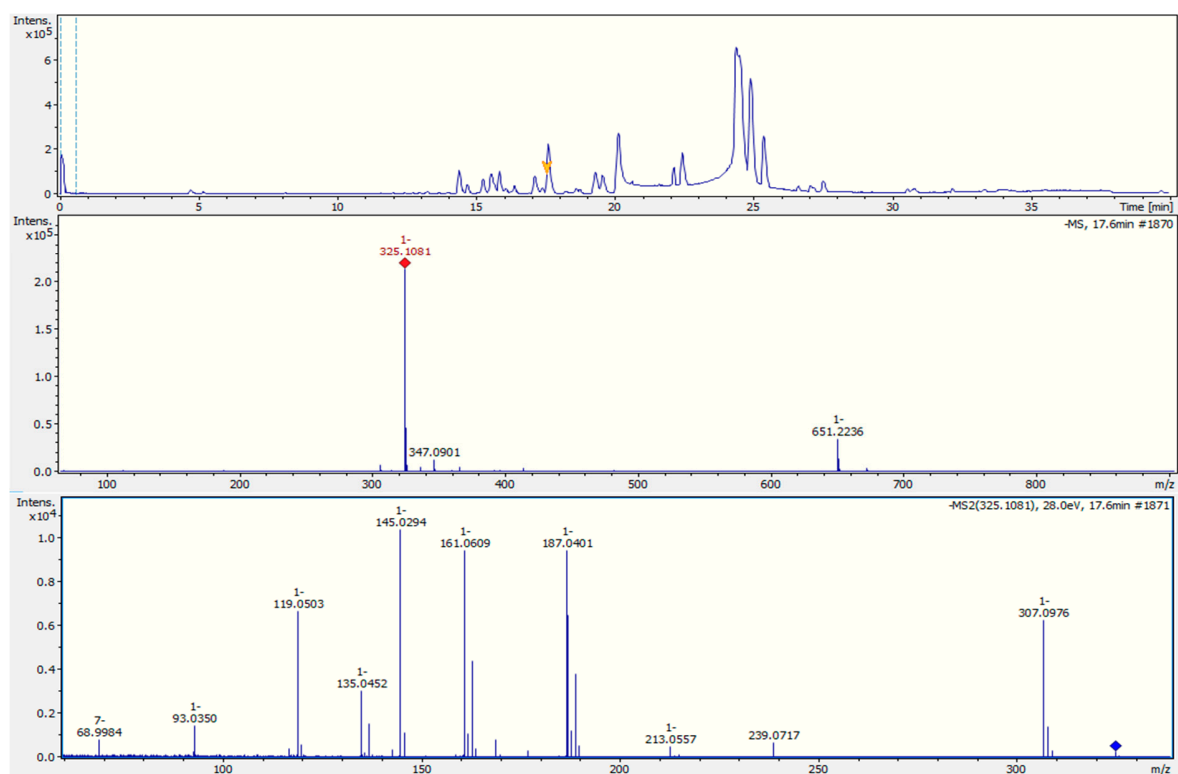

**Figure S8.** MS<sup>1</sup> and MS<sup>2</sup> spectra of compound 8

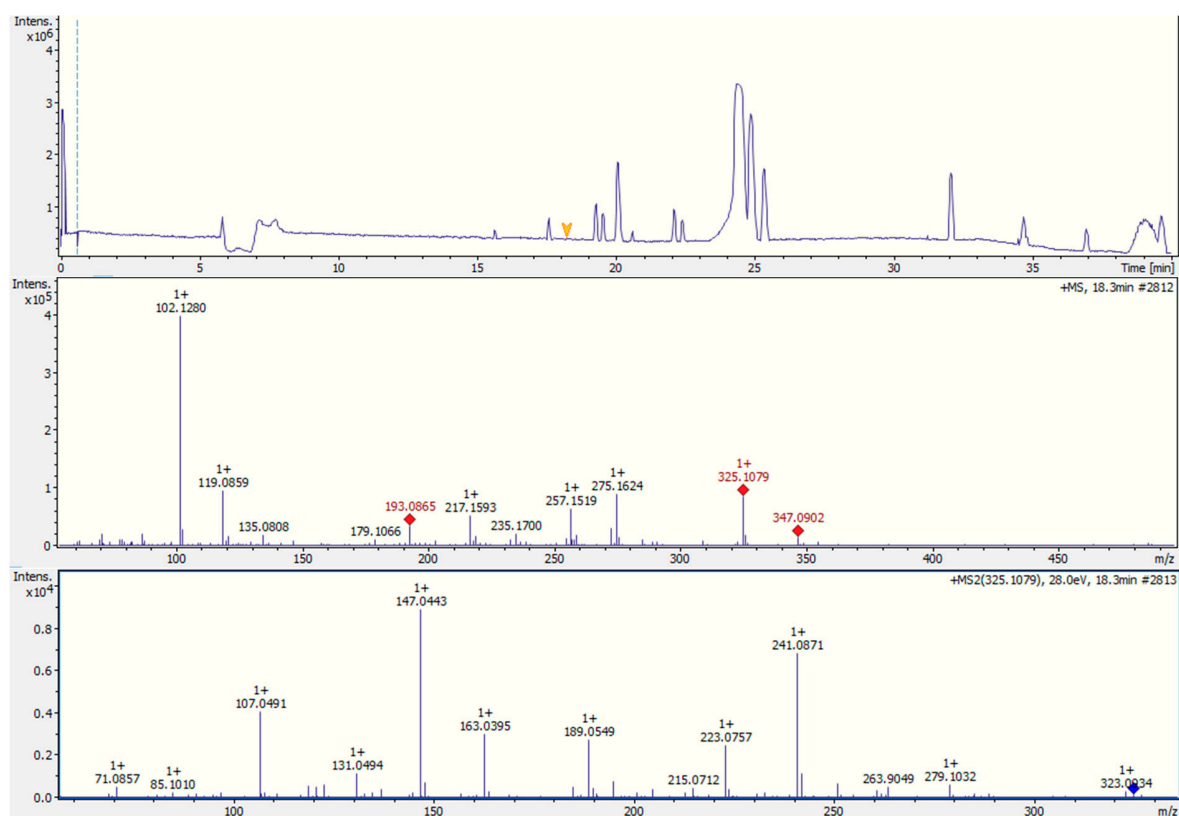

**Figure S9.** MS<sup>1</sup> and MS<sup>2</sup> spectra of compound 9

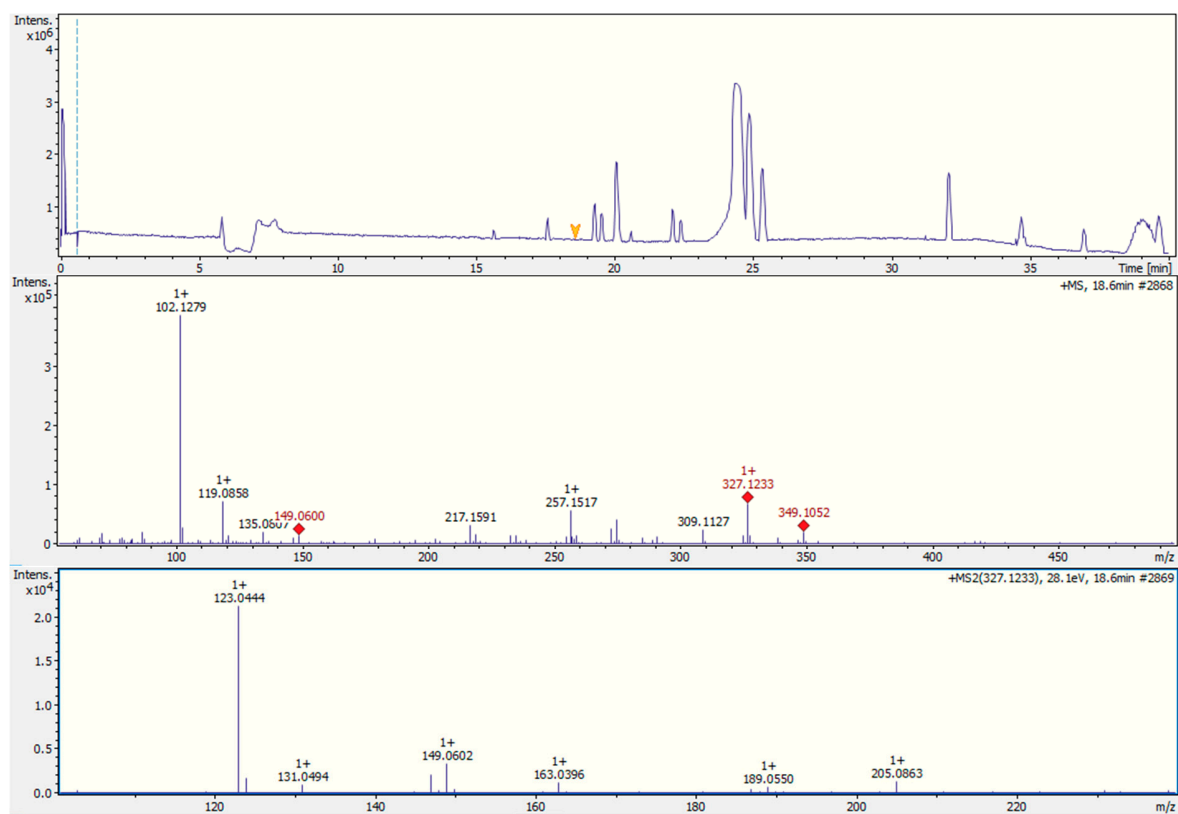

**Figure S10.** MS<sup>1</sup> and MS<sup>2</sup> spectra of compound 10

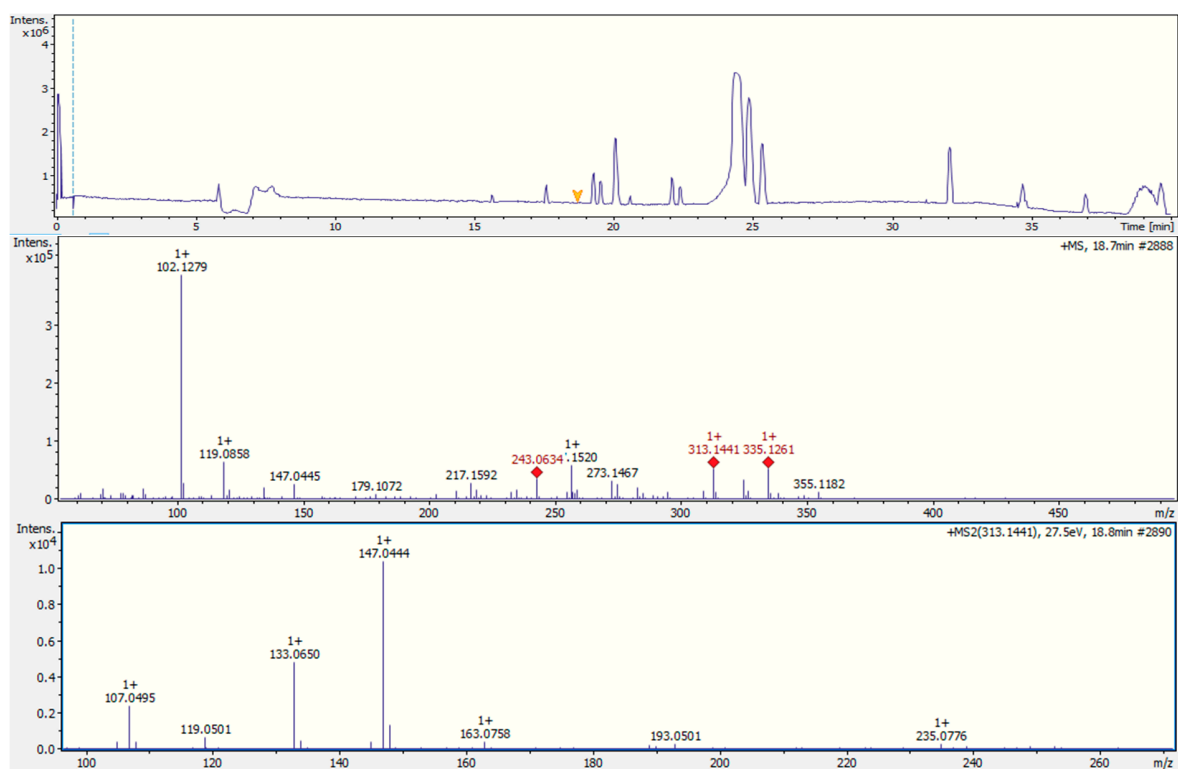

**Figure S11.** MS<sup>1</sup> and MS<sup>2</sup> spectra of compound 11

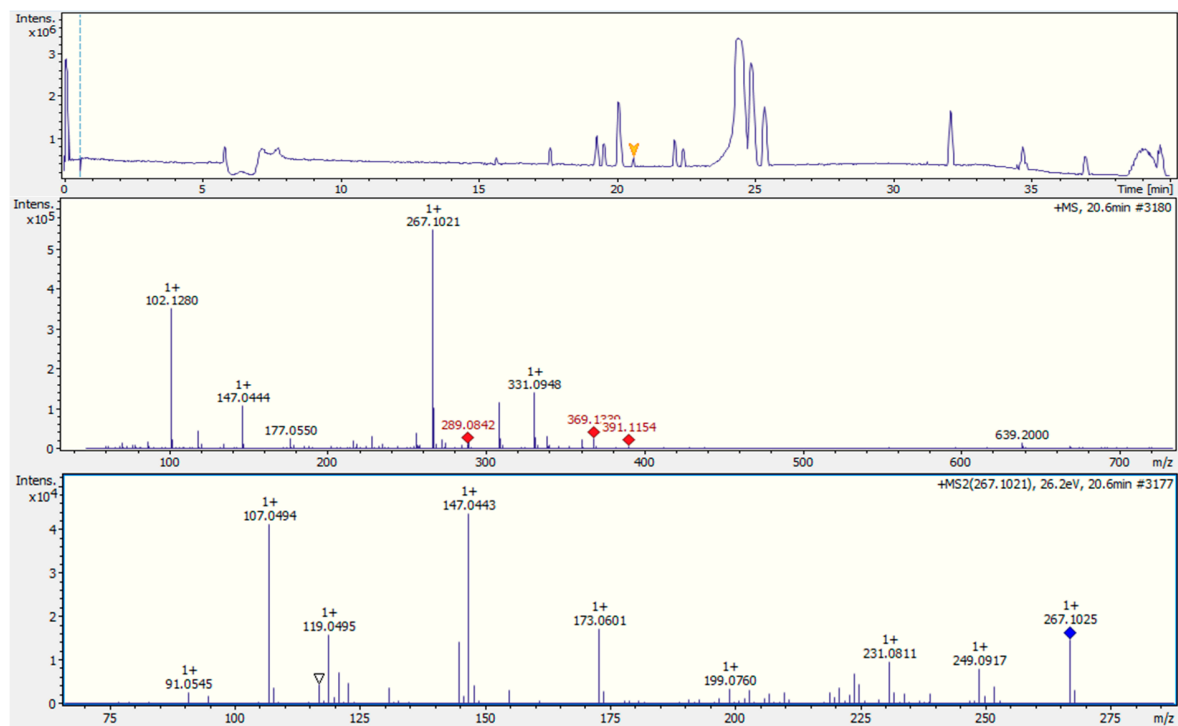

**Figure S12.** MS<sup>1</sup> and MS<sup>2</sup> spectra of compound 12

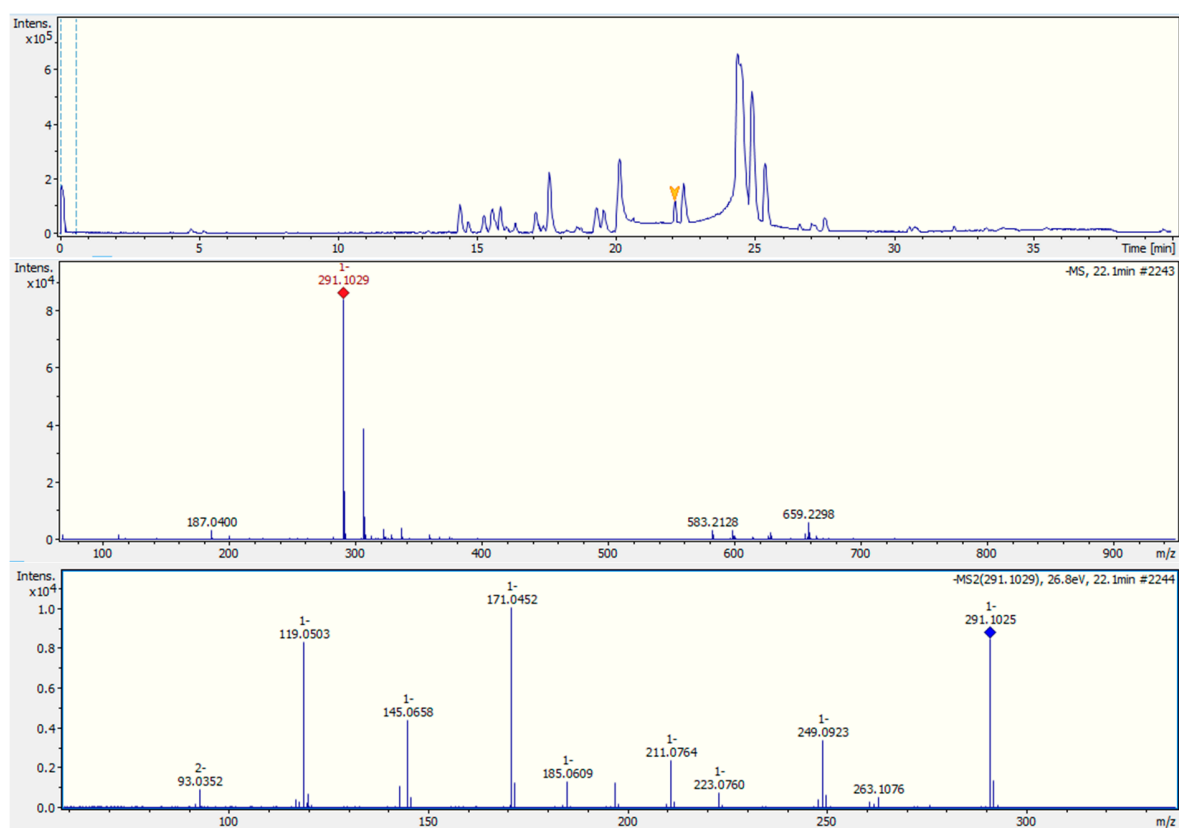

**Figure S13.** MS<sup>1</sup> and MS<sup>2</sup> spectra of compound **13**

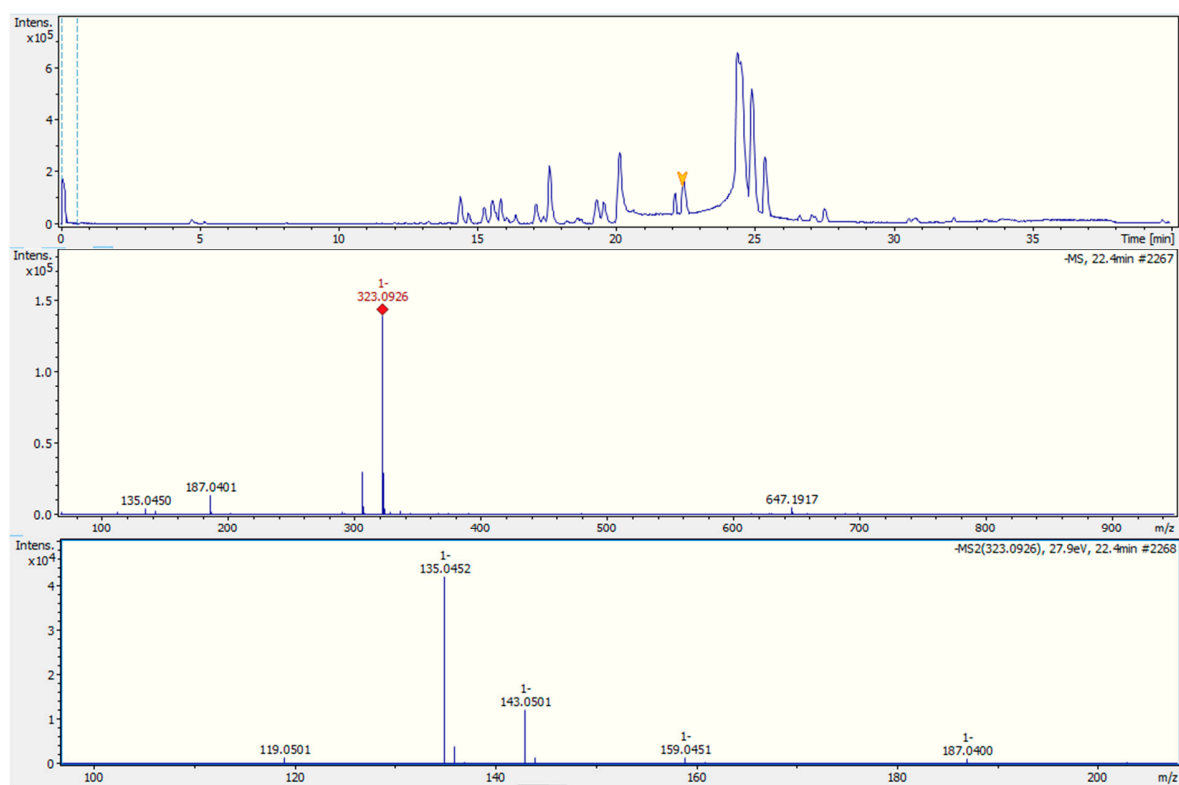

**Figure S14.** MS<sup>1</sup> and MS<sup>2</sup> spectra of compound 14



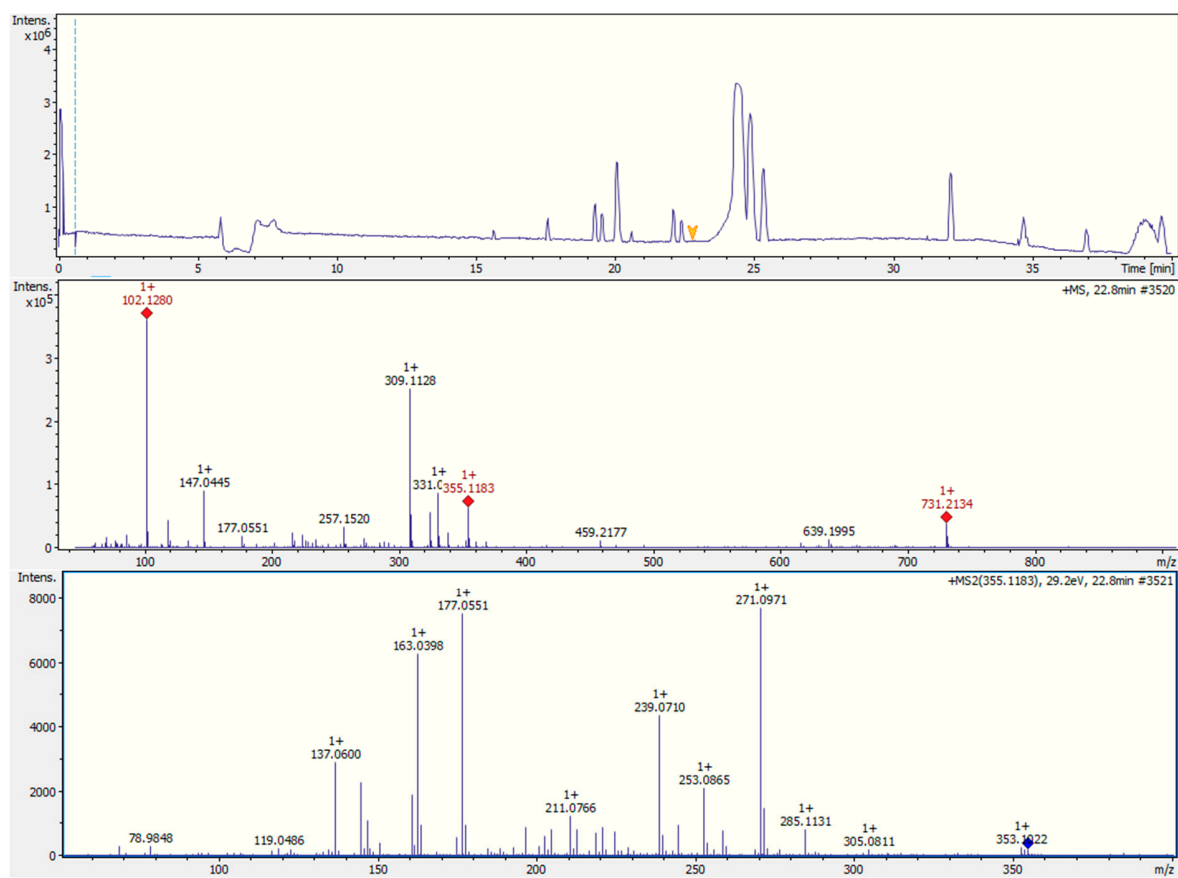

**Figure S15.** MS<sup>1</sup> and MS<sup>2</sup> spectra of compound **15**

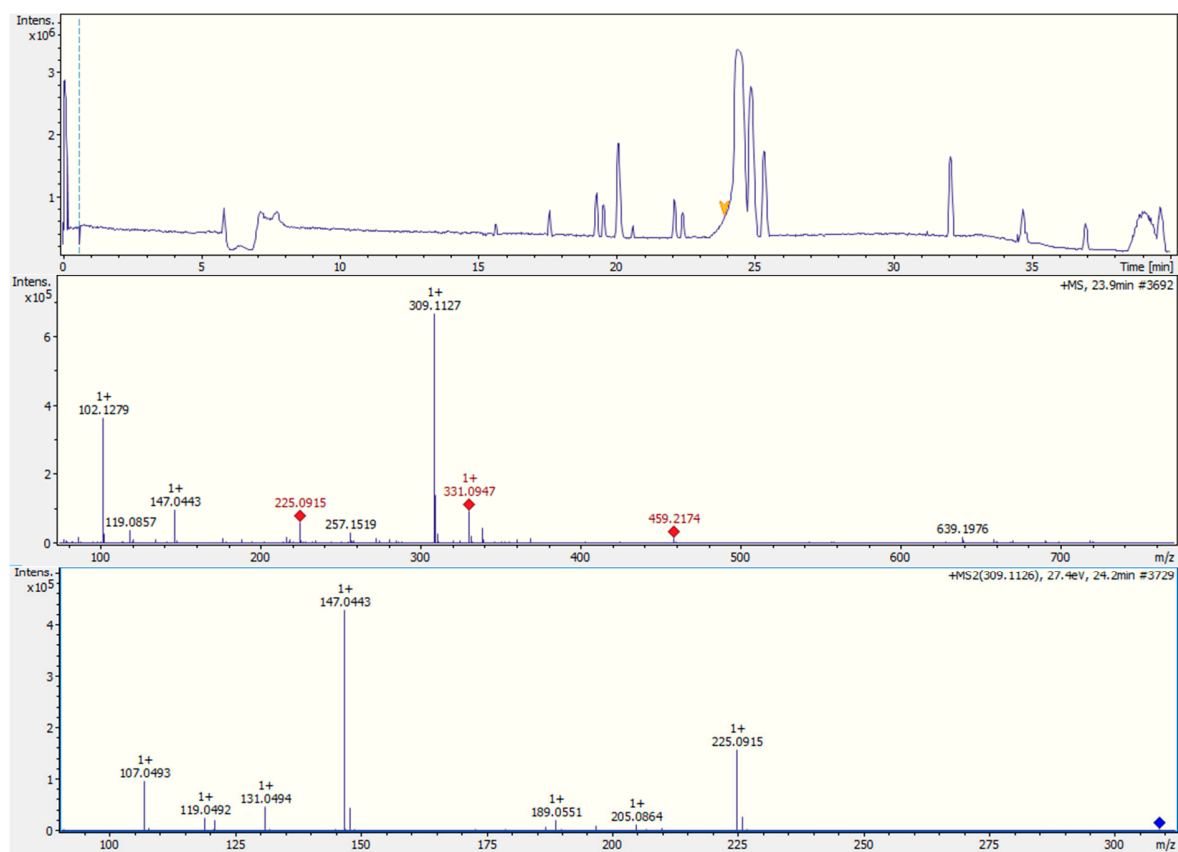

**Figure S16.** MS<sup>1</sup> and MS<sup>2</sup> spectra of compound 16

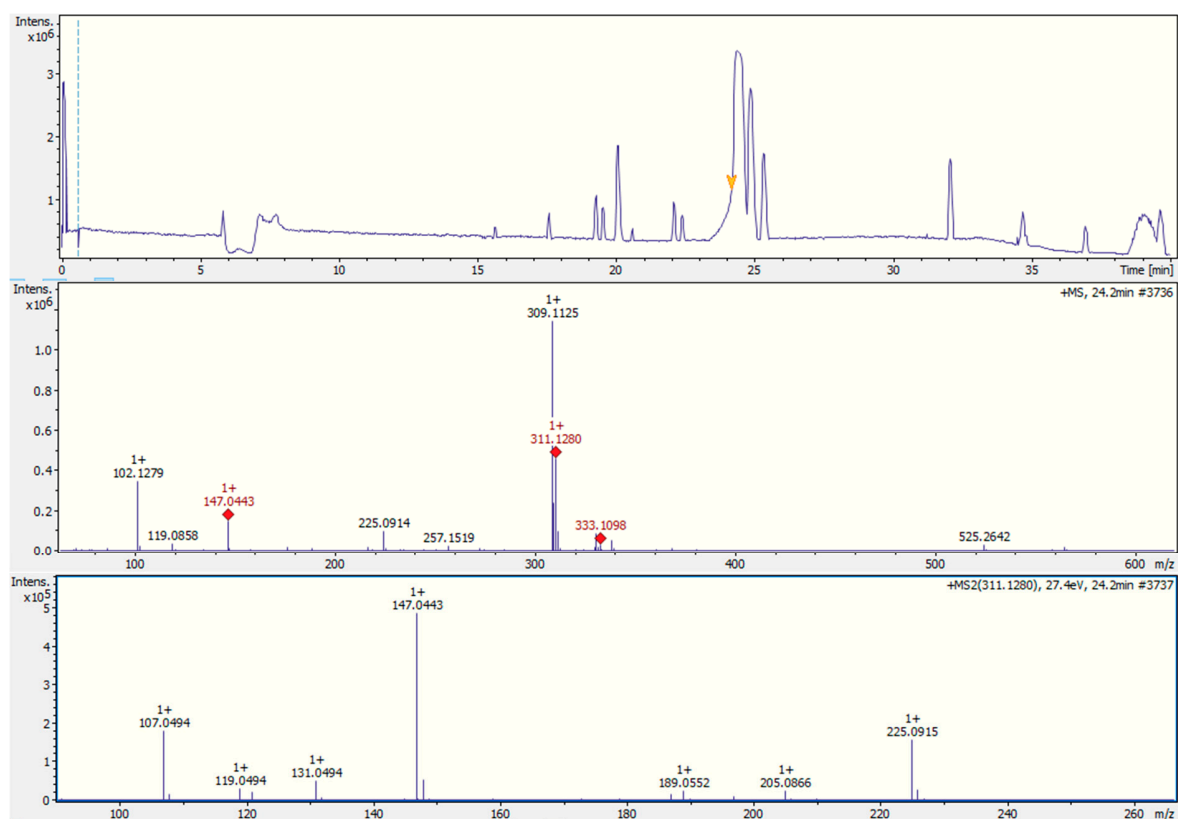

Figure S17. MS<sup>1</sup> and MS<sup>2</sup> spectra of compound 17

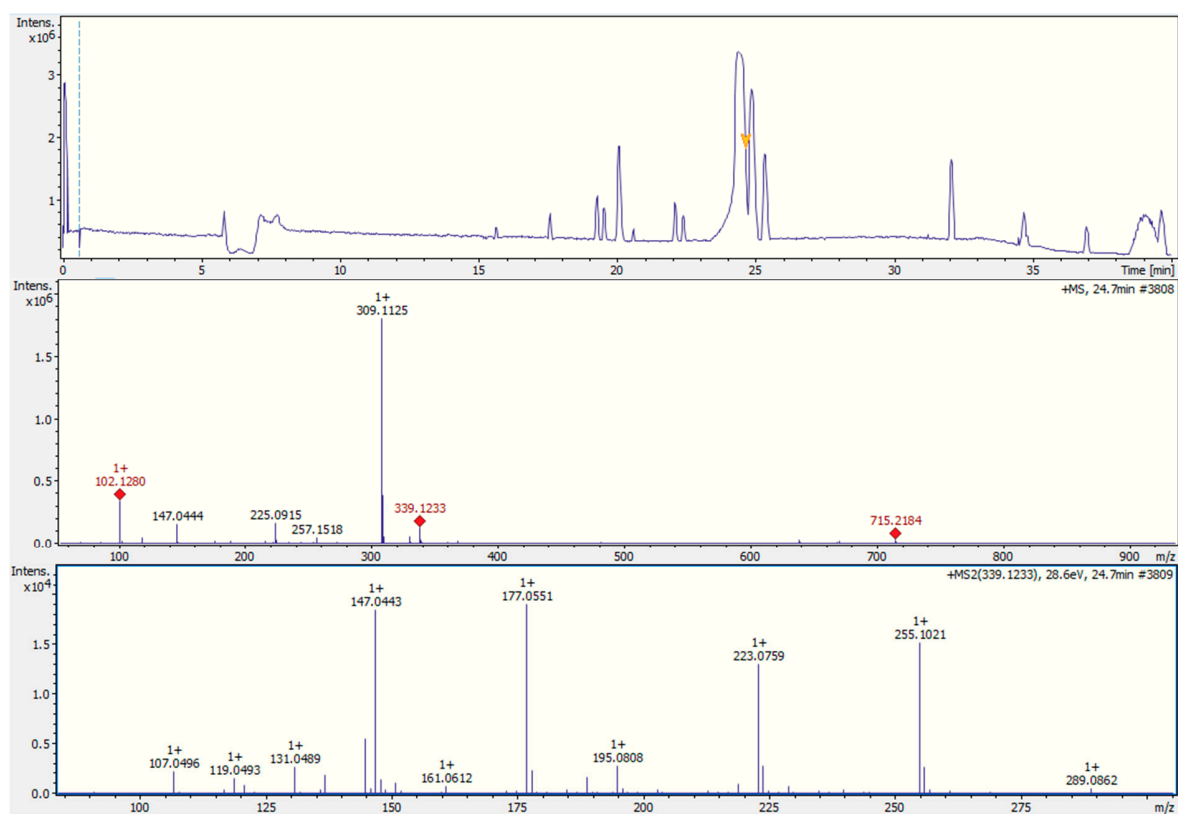

**Figure S18.** MS<sup>1</sup> and MS<sup>2</sup> spectra of compound 18

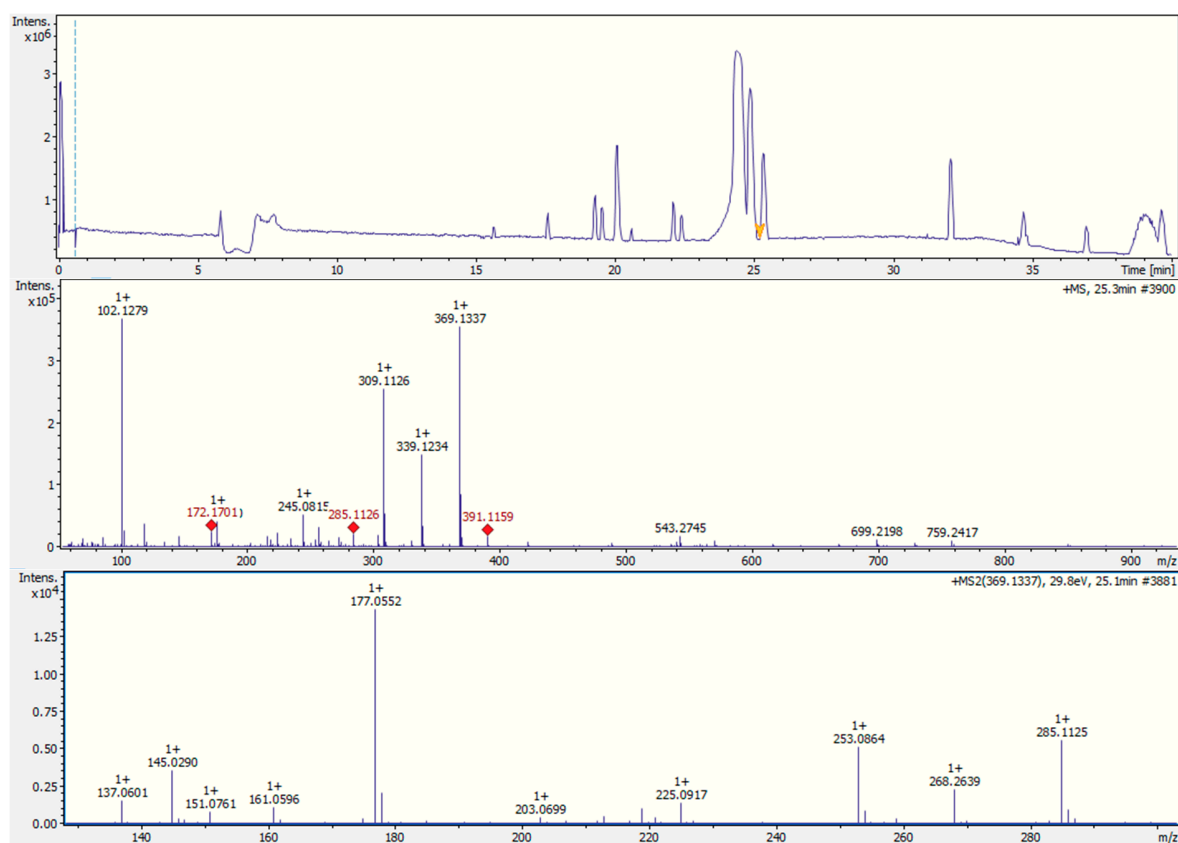

**Figure S19.** MS<sup>1</sup> and MS<sup>2</sup> spectra of compound **19**

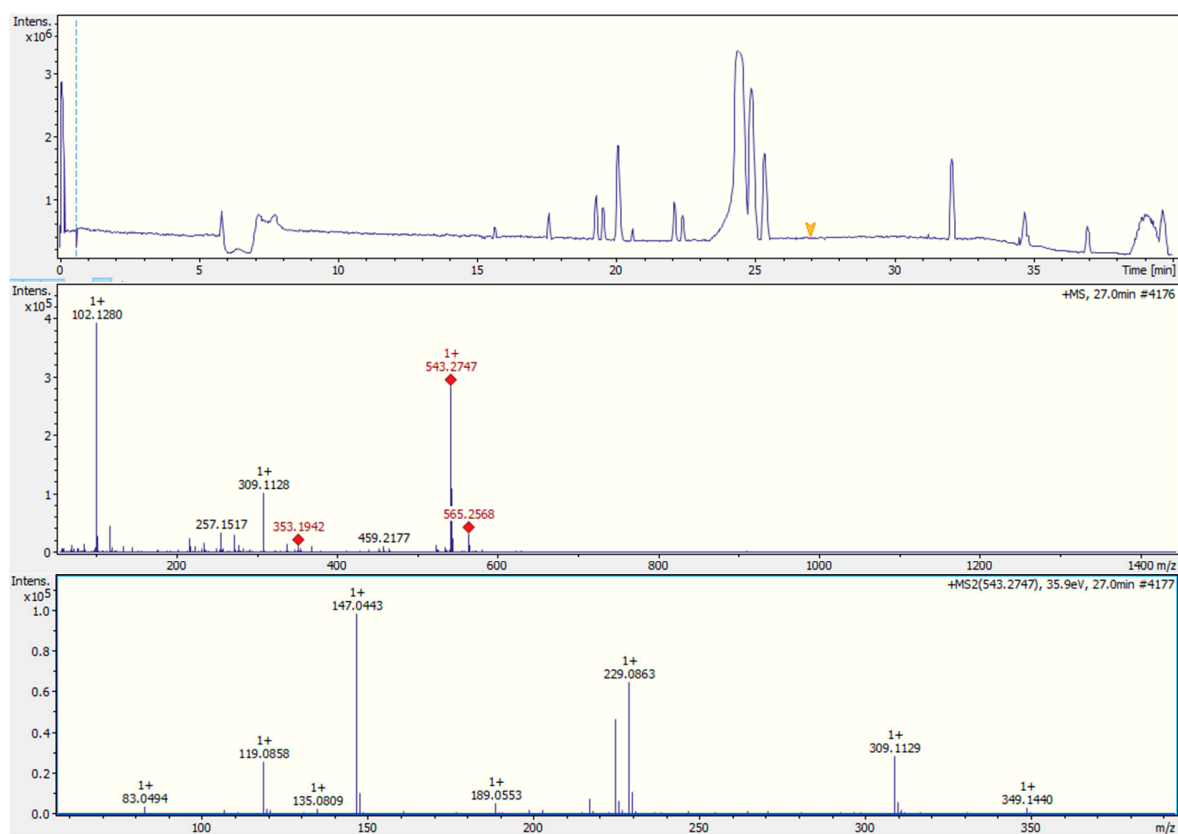

**Figure S20.** MS<sup>1</sup> and MS<sup>2</sup> spectra of compound 20

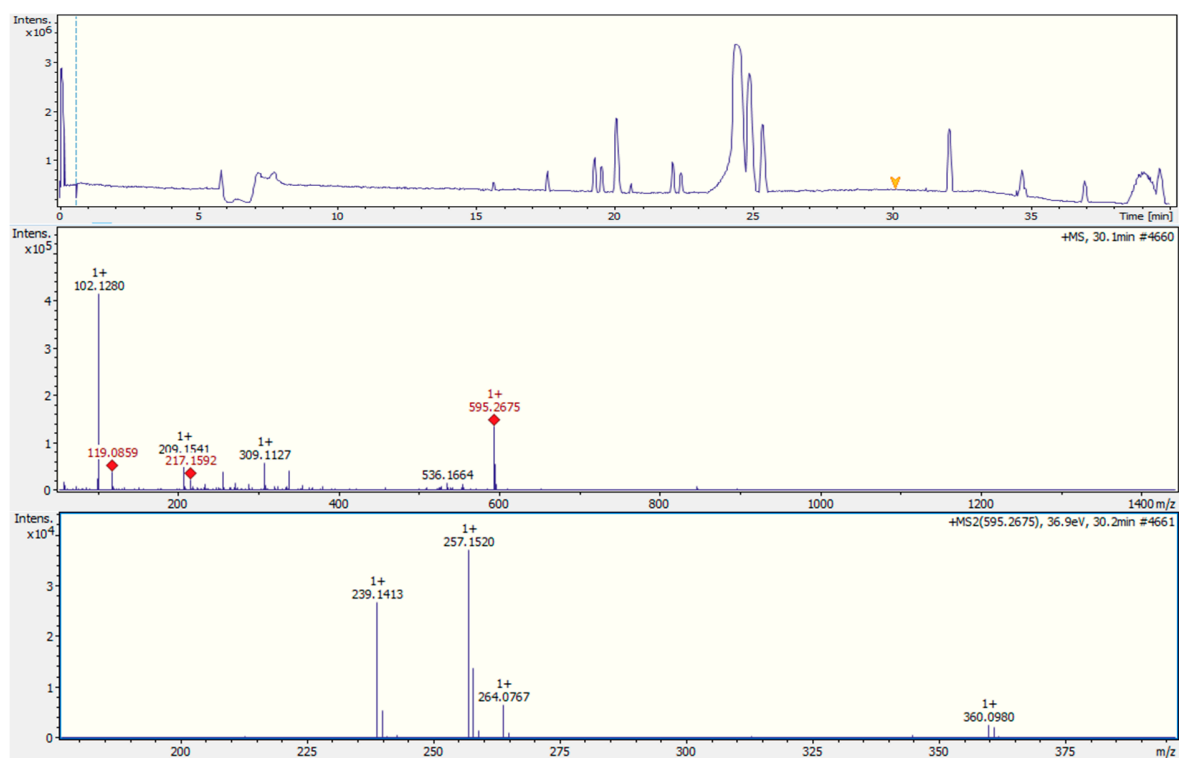

**Figure S21.** MS<sup>1</sup> and MS<sup>2</sup> spectra of compound **21**

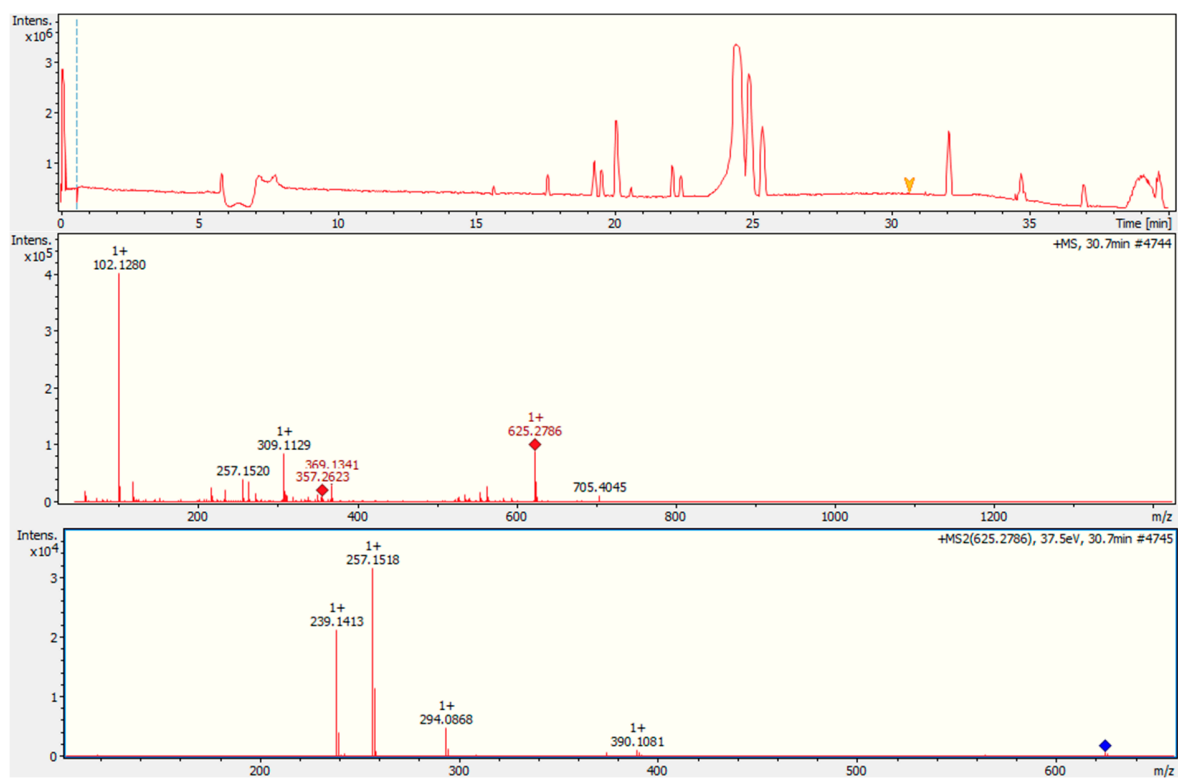

**Figure S22.** MS<sup>1</sup> and MS<sup>2</sup> spectra of compound 22



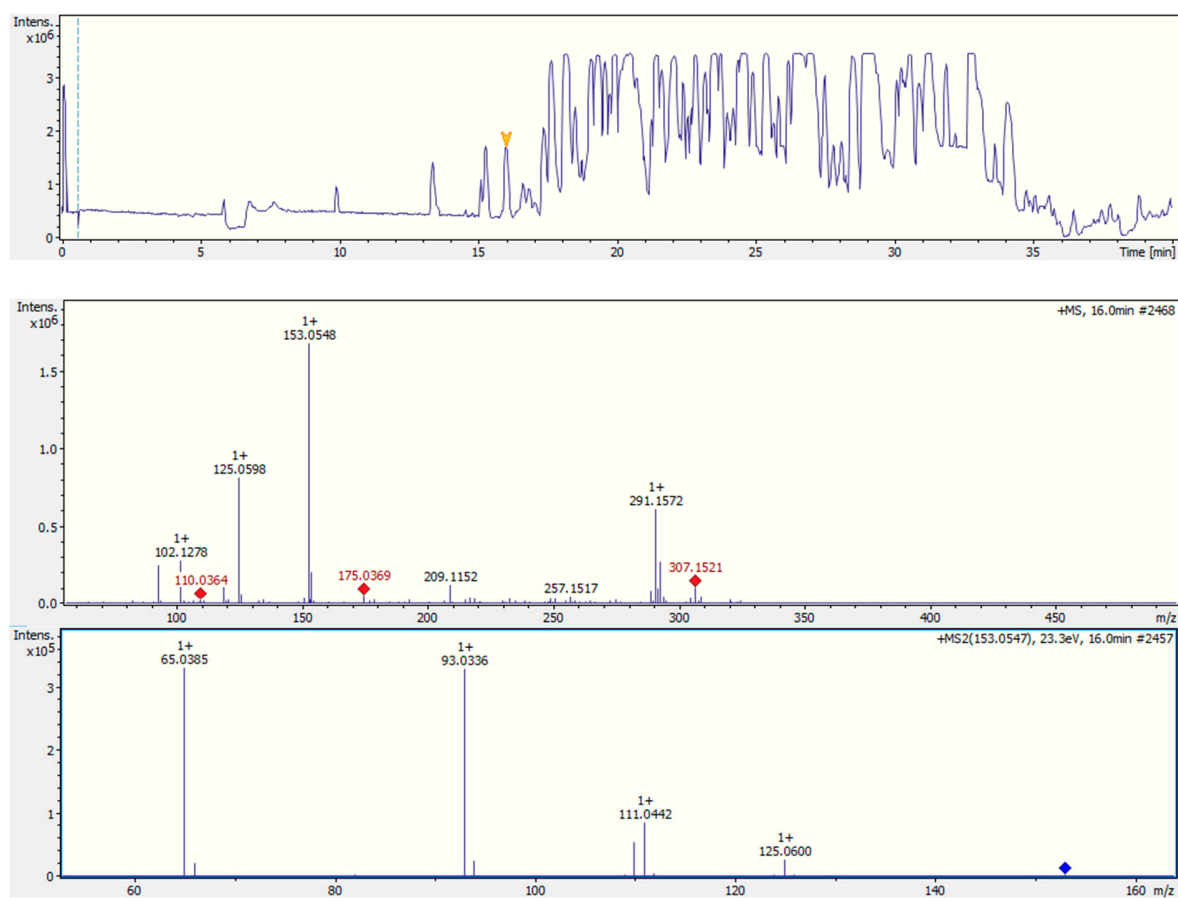

**Figure S23.** MS<sup>1</sup> and MS<sup>2</sup> spectra of compound 23

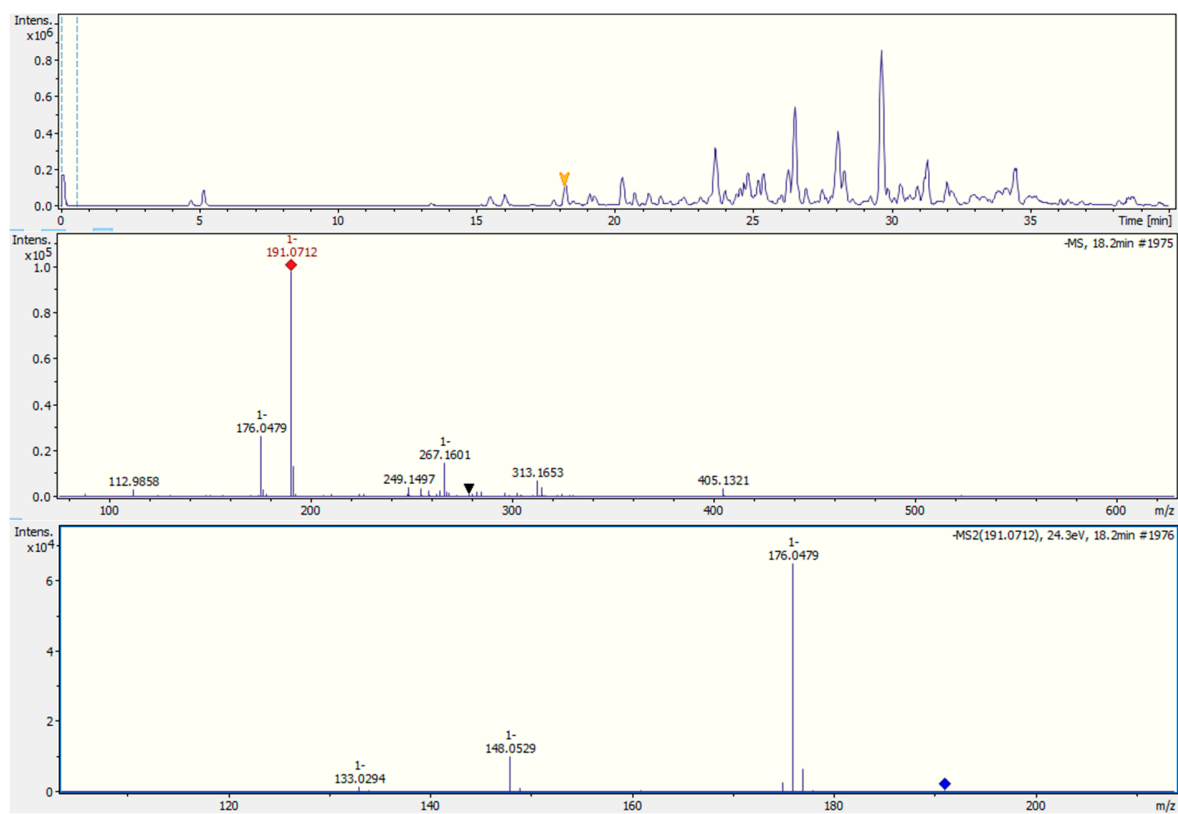

**Figure S24.** MS<sup>1</sup> and MS<sup>2</sup> spectra of compound **24**

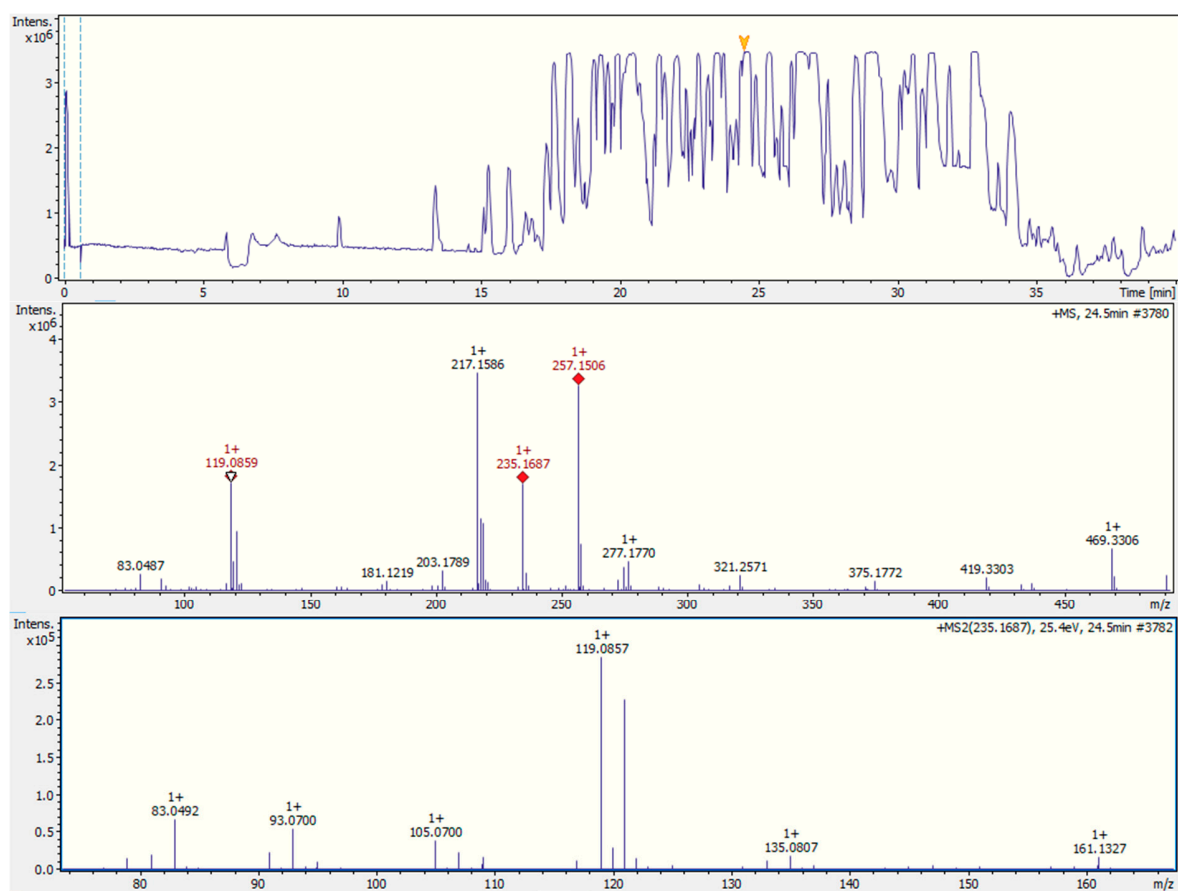

**Figure S25.** MS<sup>1</sup> and MS<sup>2</sup> spectra of compound 25

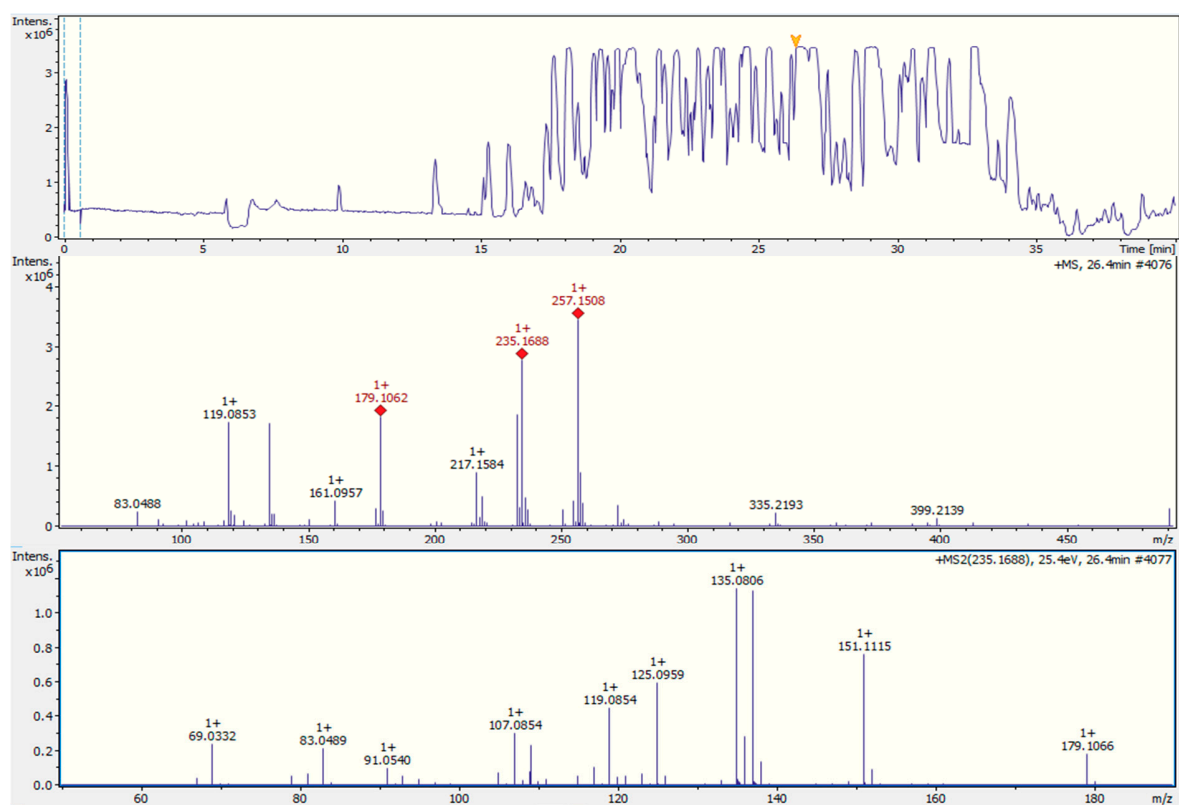

**Figure S26.** MS<sup>1</sup> and MS<sup>2</sup> spectra of compound 26

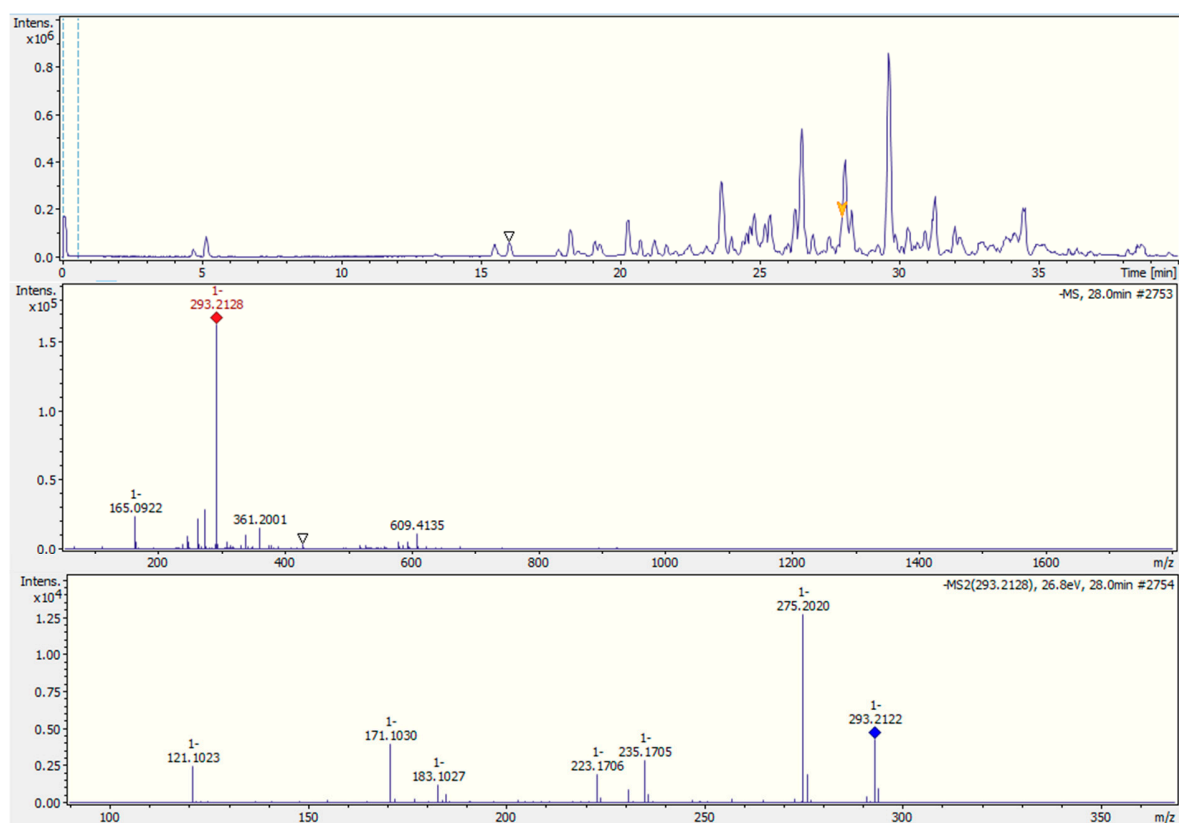

**Figure S27.** MS<sup>1</sup> and MS<sup>2</sup> spectra of compound 27

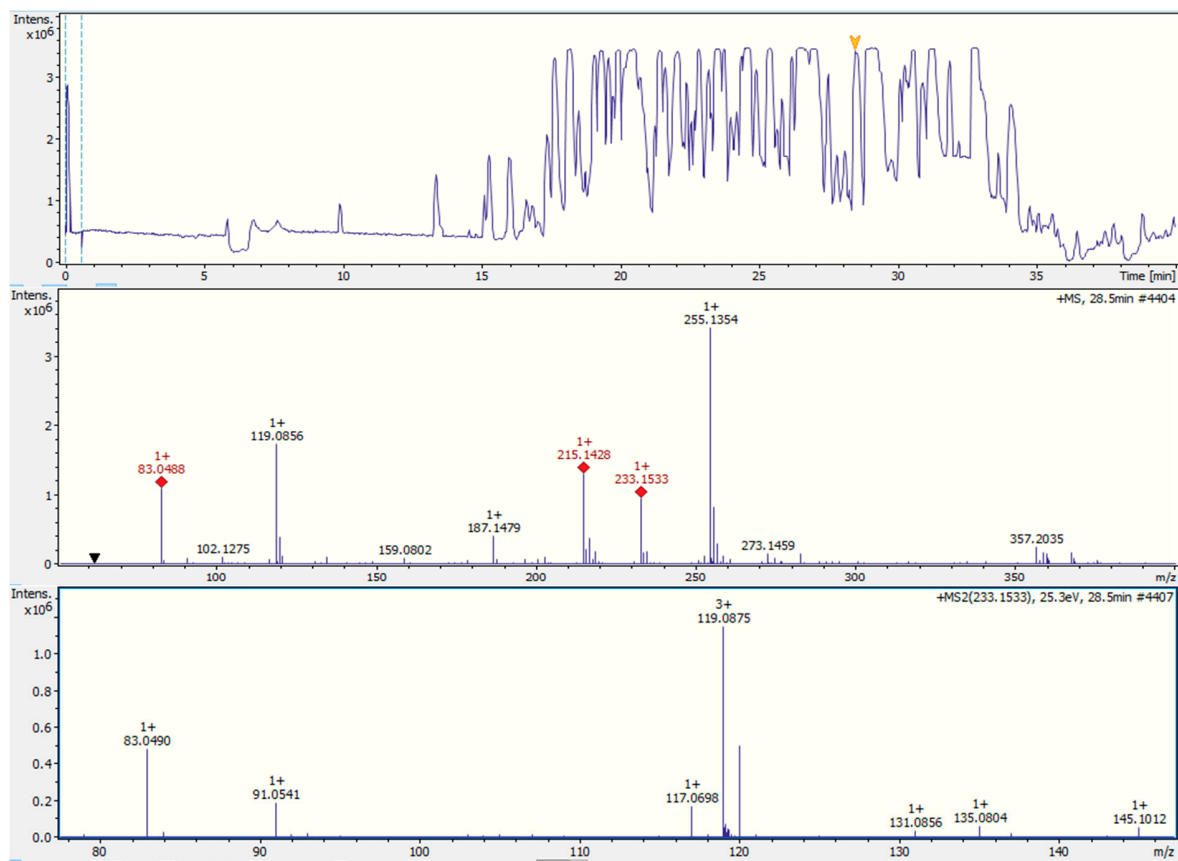

**Figure S28.** MS<sup>1</sup> and MS<sup>2</sup> spectra of compound 28

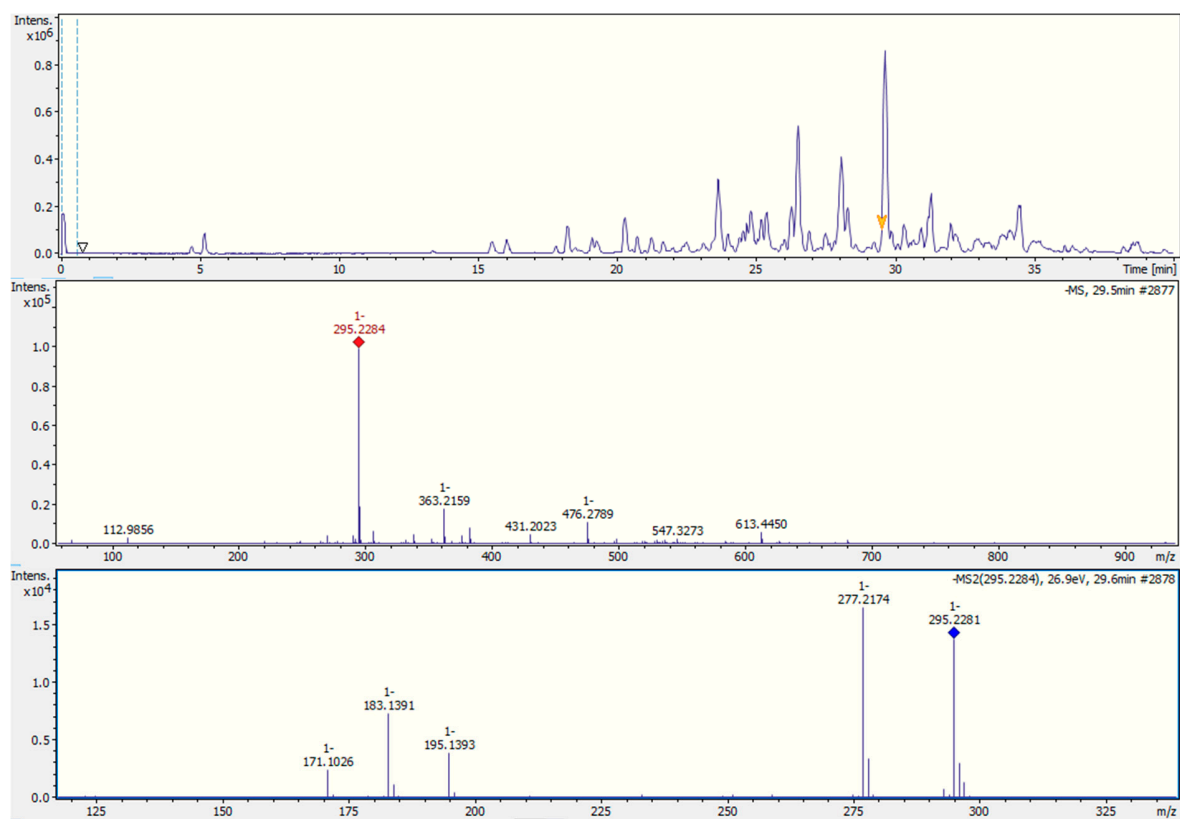

**Figure S29.** MS<sup>1</sup> and MS<sup>2</sup> spectra of compound **29**

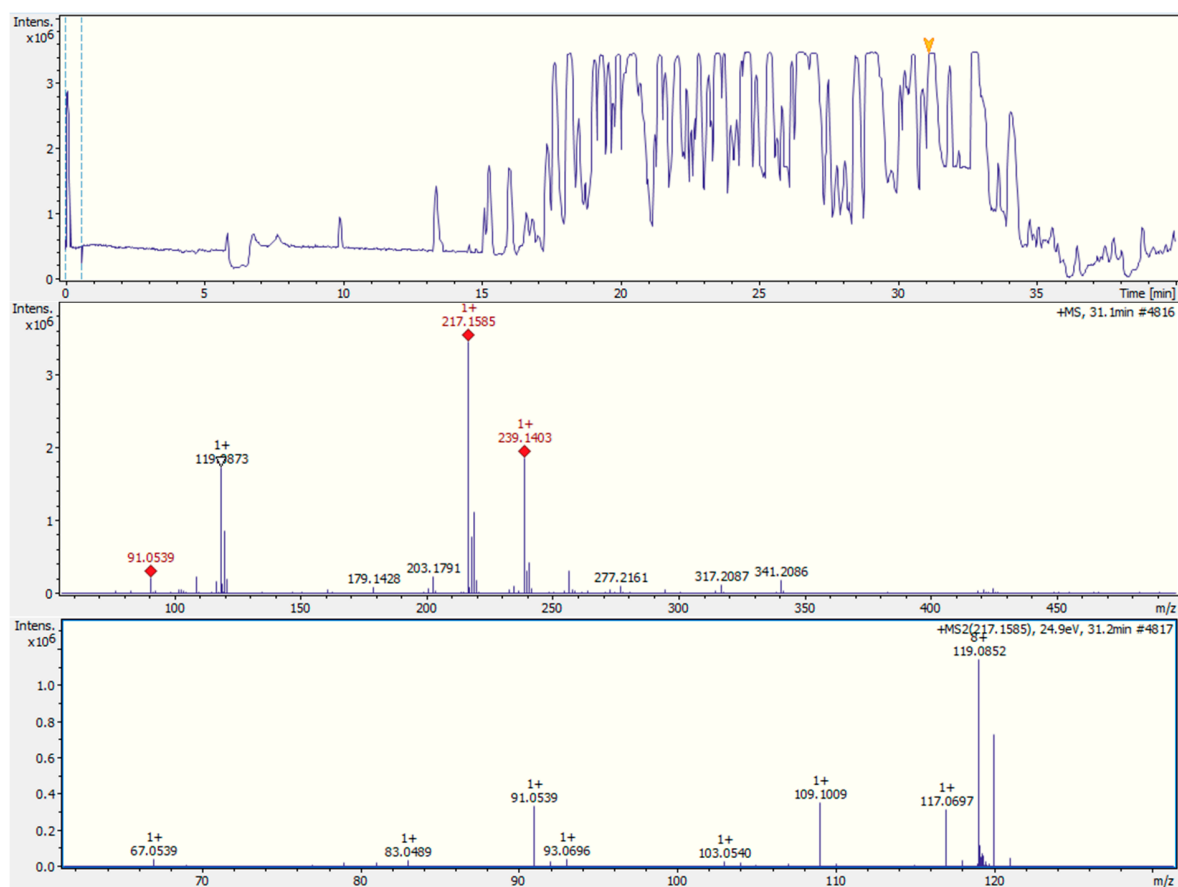

**Figure S30.** MS<sup>1</sup> and MS<sup>2</sup> spectra of compound **30**



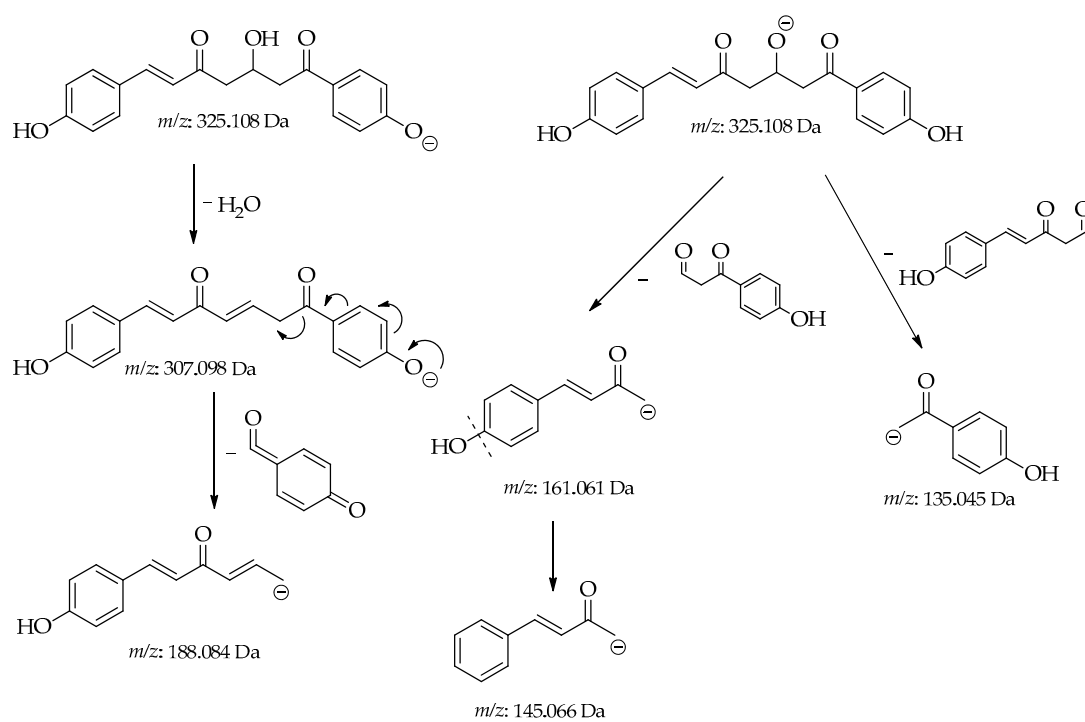

**Figure S31.** Observed CID-MS/MS fragmentation pattern of compound **8** in (-)-ESI mode.

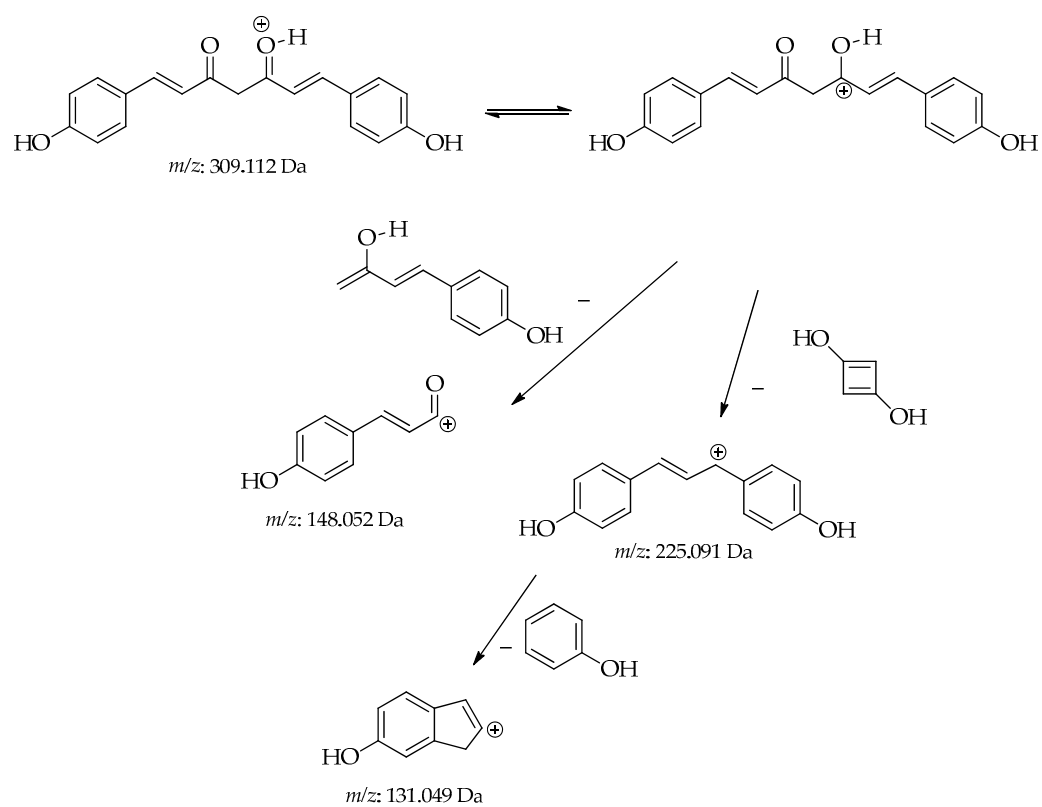

**Figure S32.** Observed CID-MS/MS fragmentation pattern of compound **16** in (+)-ESI mode.

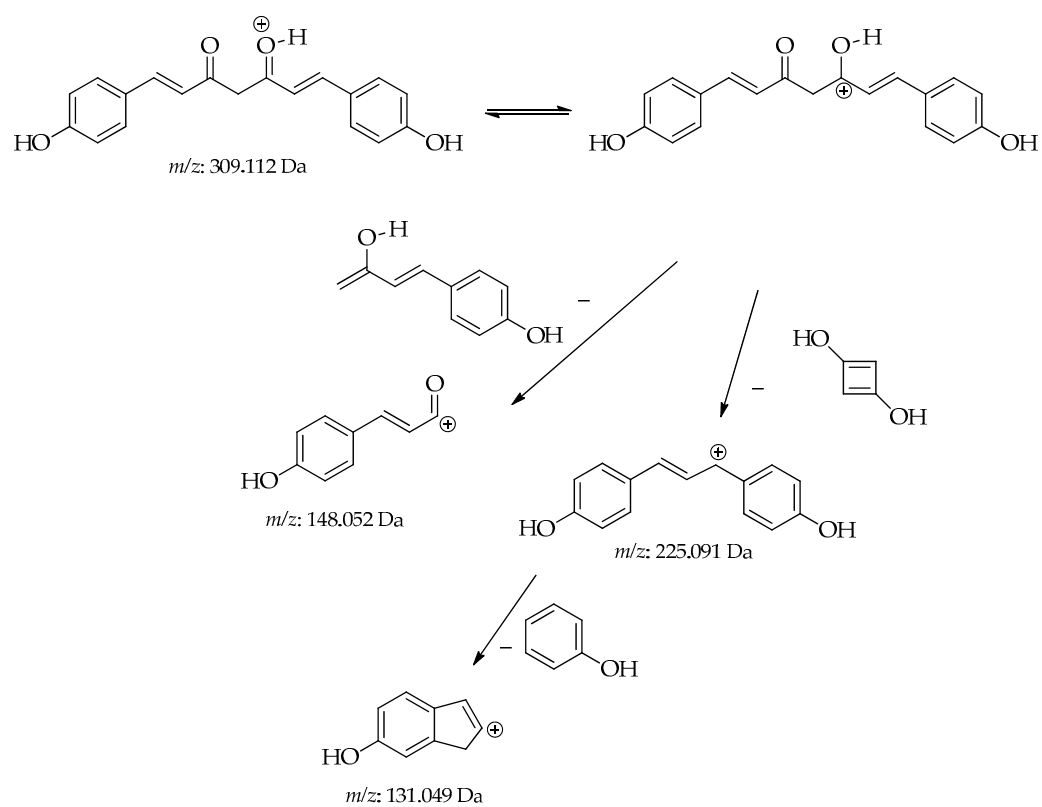

**Figure S33.** Observed CID-MS/MS fragmentation pattern of compound **17** in (+)-ESI mode.

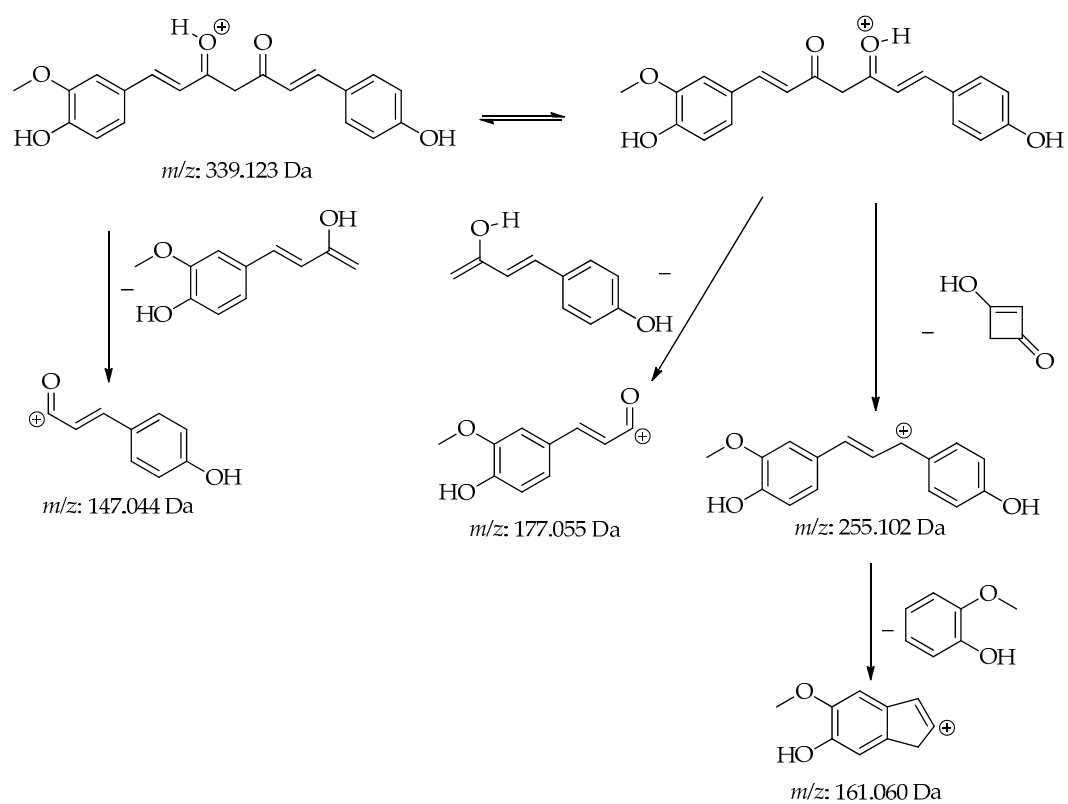

**Figure S34.** Observed CID-MS/MS fragmentation pattern of compound **18** in (+)-ESI mode.

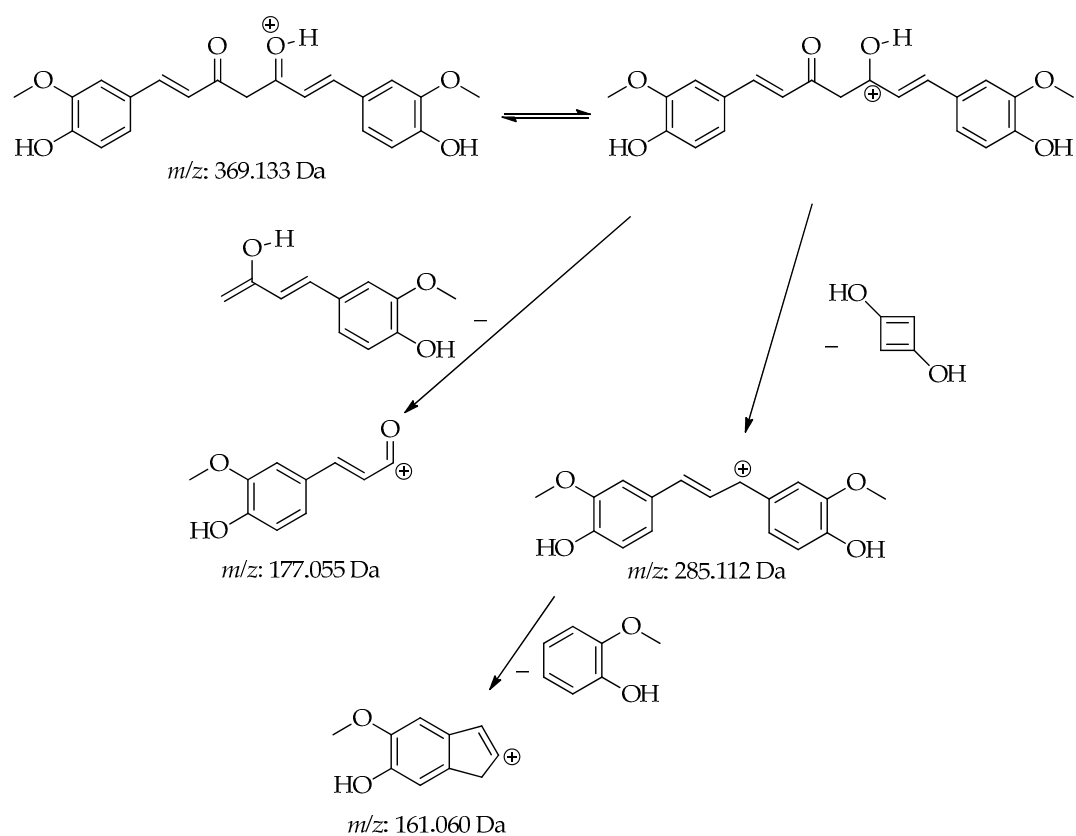

**Figure S35.** Observed CID-MS/MS fragmentation pattern of compound **19** in (+)-ESI mode.

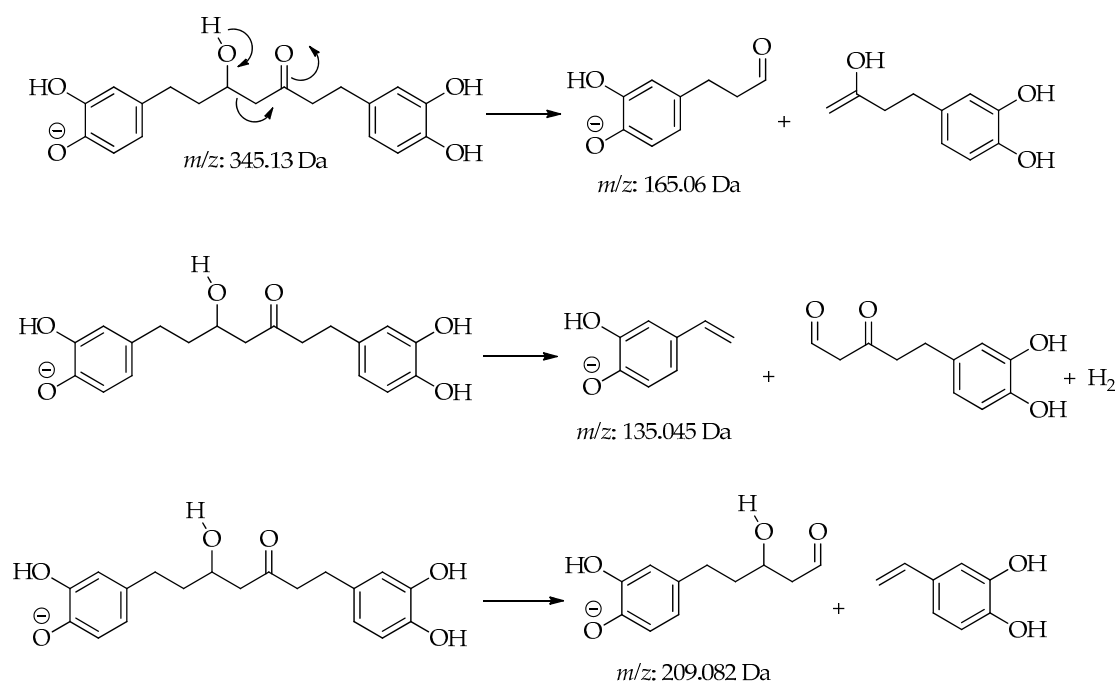

**Figure S36.** Observed CID-MS/MS fragmentation pattern of the precursor deprotonated molecule  $[M-H]^-$  at  $m/z$  345.1340.

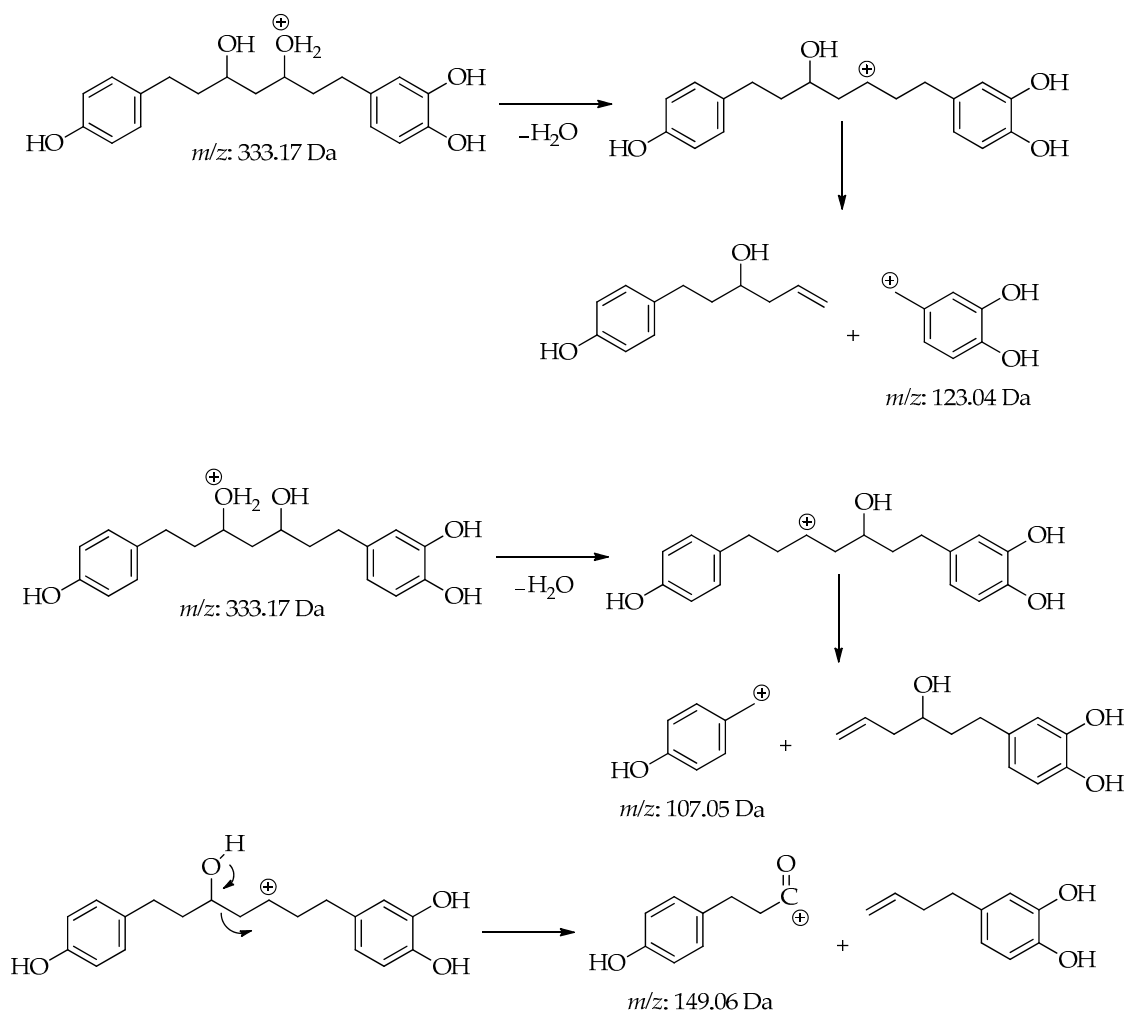

**Figure S37.** Observed CID-MS/MS fragmentation pattern of the precursor protonated molecule  $[M+H]^+$  at  $m/z$  333.1705.

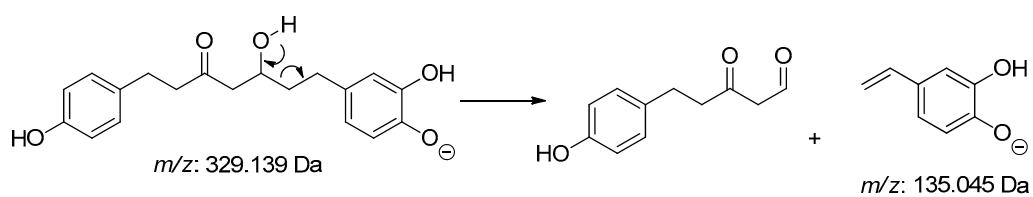

**Figure S38.** Observed CID-MS/MS fragmentation pattern of the precursor deprotonated molecule  $[M-H]^-$  at  $m/z$  329.1394.

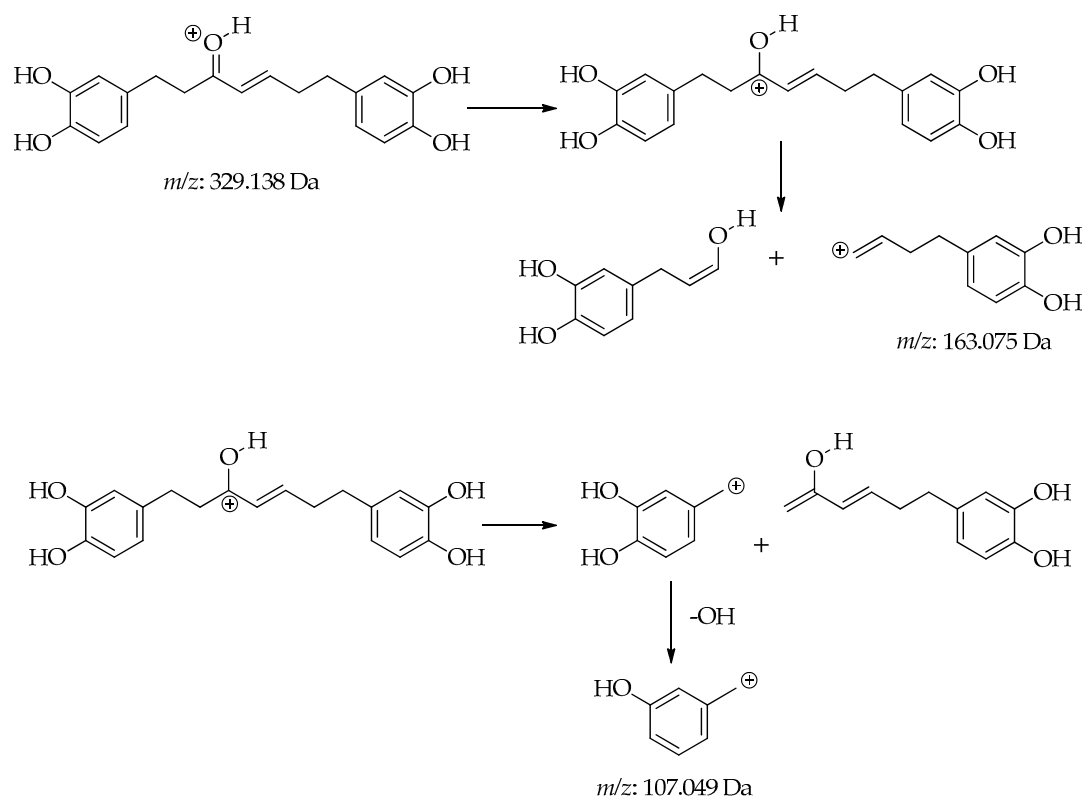

**Figure S39.** Observed CID-MS/MS fragmentation pattern of the precursor protonated molecule  $[M+H]^+$  at  $m/z$  329.1392.



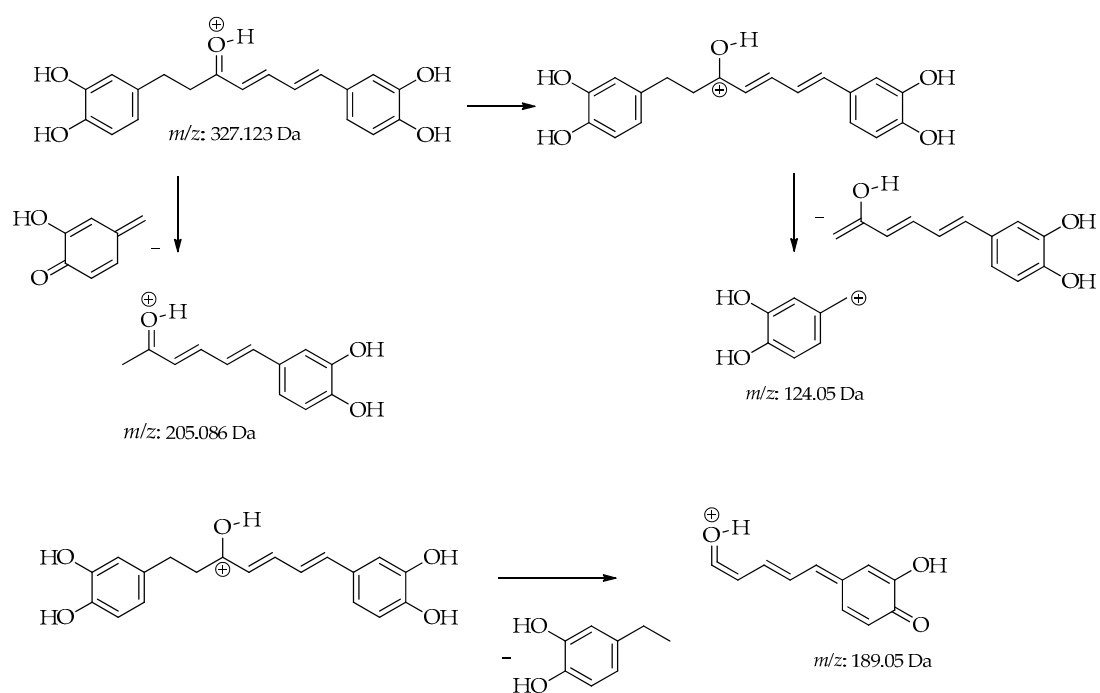

**Figure S40.** Observed CID-MS/MS fragmentation pattern of the precursor protonated molecule  $[M+H]^+$  at  $m/z$  327.1233.

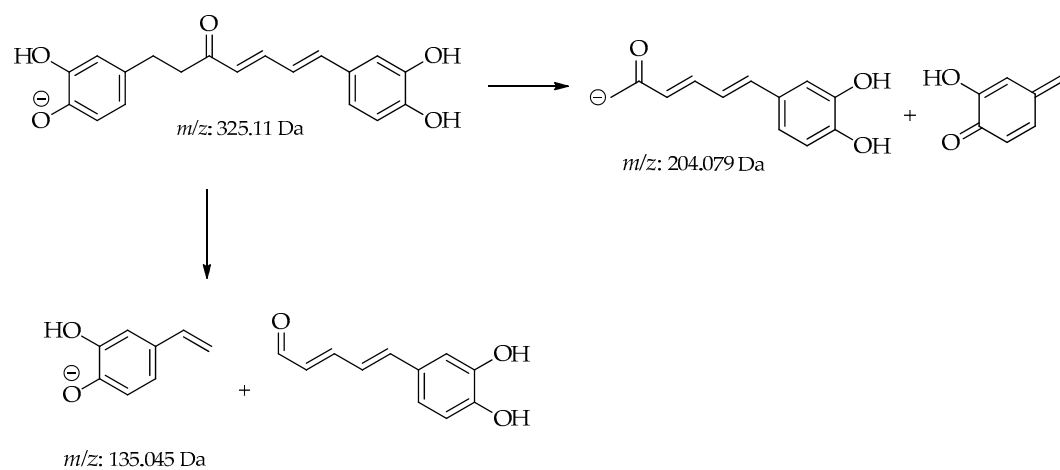

**Figure S41.** Observed CID-MS/MS fragmentation pattern of the precursor deprotonated molecule  $[M-H]^-$  at  $m/z$  325.1079.
